# Supplementary material for: A novel checkpoint pathway controls actomyosin ring constriction trigger in fission yeast
Source: eLife journal article supplement (doi:10.7554/elife.59333), 2020-10-26
Supplement: supp [file elife-59333-supp-v1.zip]

Archive with 35 entries (35 files):
- elife_poa_e59333_Figure_2_source_data_1.xlsx
- elife_poa_e59333_Figure_3_source_data_1.xlsx
- elife_poa_e59333_Figure_4_source_data_1.xlsx
- elife_poa_e59333_Figure_6_source_data_1.xlsx
- elife_poa_e59333_Figure_7_source_data_1.xlsx
- elife_poa_e59333_Video_1.mp4
- elife_poa_e59333_Video_2.mp4
- elife_poa_e59333_Video_3.mp4
- elife_poa_e59333_Video_4.mp4
- elife_poa_e59333_Video_5.mp4
- elife_poa_e59333_Transparent_Reporting_File.pdf
- elife_poa_e59333_Figure_1_figure_supplement_1.pdf
- elife_poa_e59333_Figure_1_figure_supplement_2.pdf
- elife_poa_e59333_Figure_2_figure_supplement_1.pdf
- elife_poa_e59333_Figure_2_figure_supplement_2.pdf
- elife_poa_e59333_Figure_3_figure_supplement_1.pdf
- elife_poa_e59333_Figure_4_figure_supplement_1.pdf
- elife_poa_e59333_Figure_4_figure_supplement_2.pdf
- elife_poa_e59333_Figure_4_figure_supplement_3.pdf
- elife_poa_e59333_Figure_4_figure_supplement_4.pdf
- elife_poa_e59333_Figure_4_figure_supplement_5.pdf
- elife_poa_e59333_Figure_6_figure_supplement_1.pdf
- elife_poa_e59333_Figure_6_figure_supplement_2.pdf
- elife_poa_e59333_Figure_7_figure_supplement_1.pdf
- elife_poa_e59333_Figure_2_figure_supplement_1_source_data_1.xlsx
- elife_poa_e59333_Figure_2_figure_supplement_2_source_data_1.xlsx
- elife_poa_e59333_Figure_3_figure_supplement_1_source_data_1.xlsx
- elife_poa_e59333_figure_4_figure_supplement_1_source_data_1.xlsx
- elife_poa_e59333_Figure_4_figure_supplement_2_source_data_1.xlsx
- elife_poa_e59333_Figure_4_figure_supplement_3_source_data_1.xlsx
- elife_poa_e59333_figure_4_figure_supplement_4_source_data_1.xlsx
- elife_poa_e59333_figure_4_figure_supplement_5_source_data_1.xlsx
- elife_poa_e59333_Figure_6_figure_supplement_1_source_data_1.xlsx
- elife_poa_e59333_Figure_6_figure_supplement_2_source_data_1.xlsx
- elife_poa_e59333_Figure_7_figure_supplement_1_source_data_1.xlsx
