# Supplementary material for: A novel checkpoint pathway controls actomyosin ring constriction trigger in fission yeast
Source: eLife journal article supplement (doi:10.7554/elife.59333), 2020-10-26
Supplement: supp [file elife-59333-supp-v1.zip › elife_poa_e59333_Figure_1_figure_supplement_1.pdf]

Figure 1-figure supplement 1

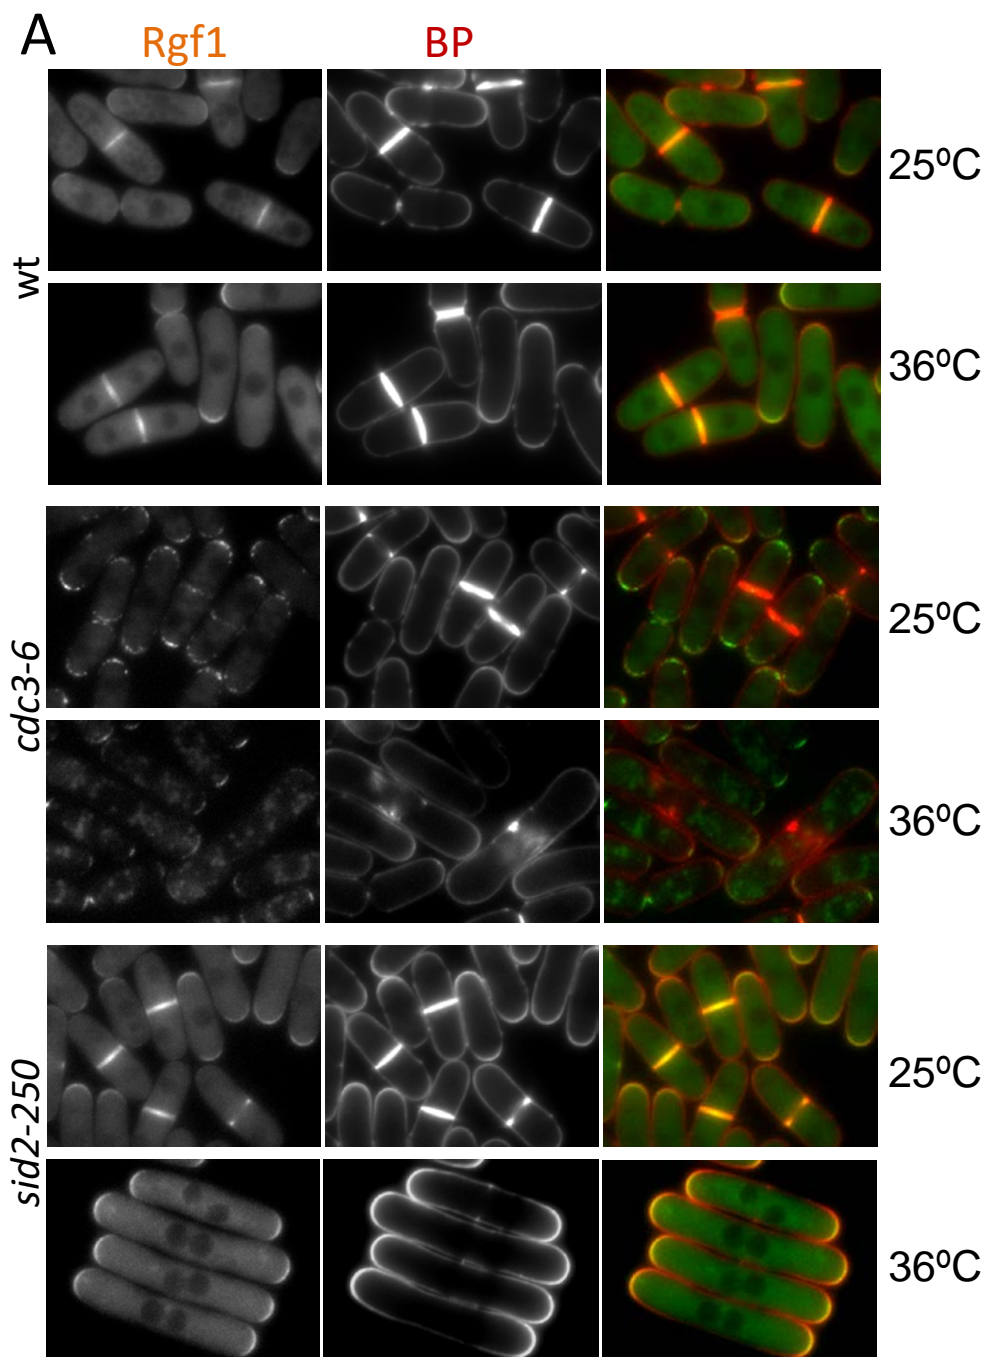

**Rgf1p localization in CAR mutants** (Figure 1-figure supplement 1).

Wild type, *cdc3-6* and *sid2-250* cells expressing Rgf1p-GFP endogenously were incubated at 25°C or 36°C for 4h, treated with Blankophor (BP) to visualize the septum, and imaged for GFP and BP fluorescence.
