# Supplementary material for: A novel checkpoint pathway controls actomyosin ring constriction trigger in fission yeast
Source: eLife journal article supplement (doi:10.7554/elife.59333), 2020-10-26
Supplement: supp [file elife-59333-supp-v1.zip › elife_poa_e59333_Figure_1_figure_supplement_2.pdf]

Figure 1-figure supplement 2

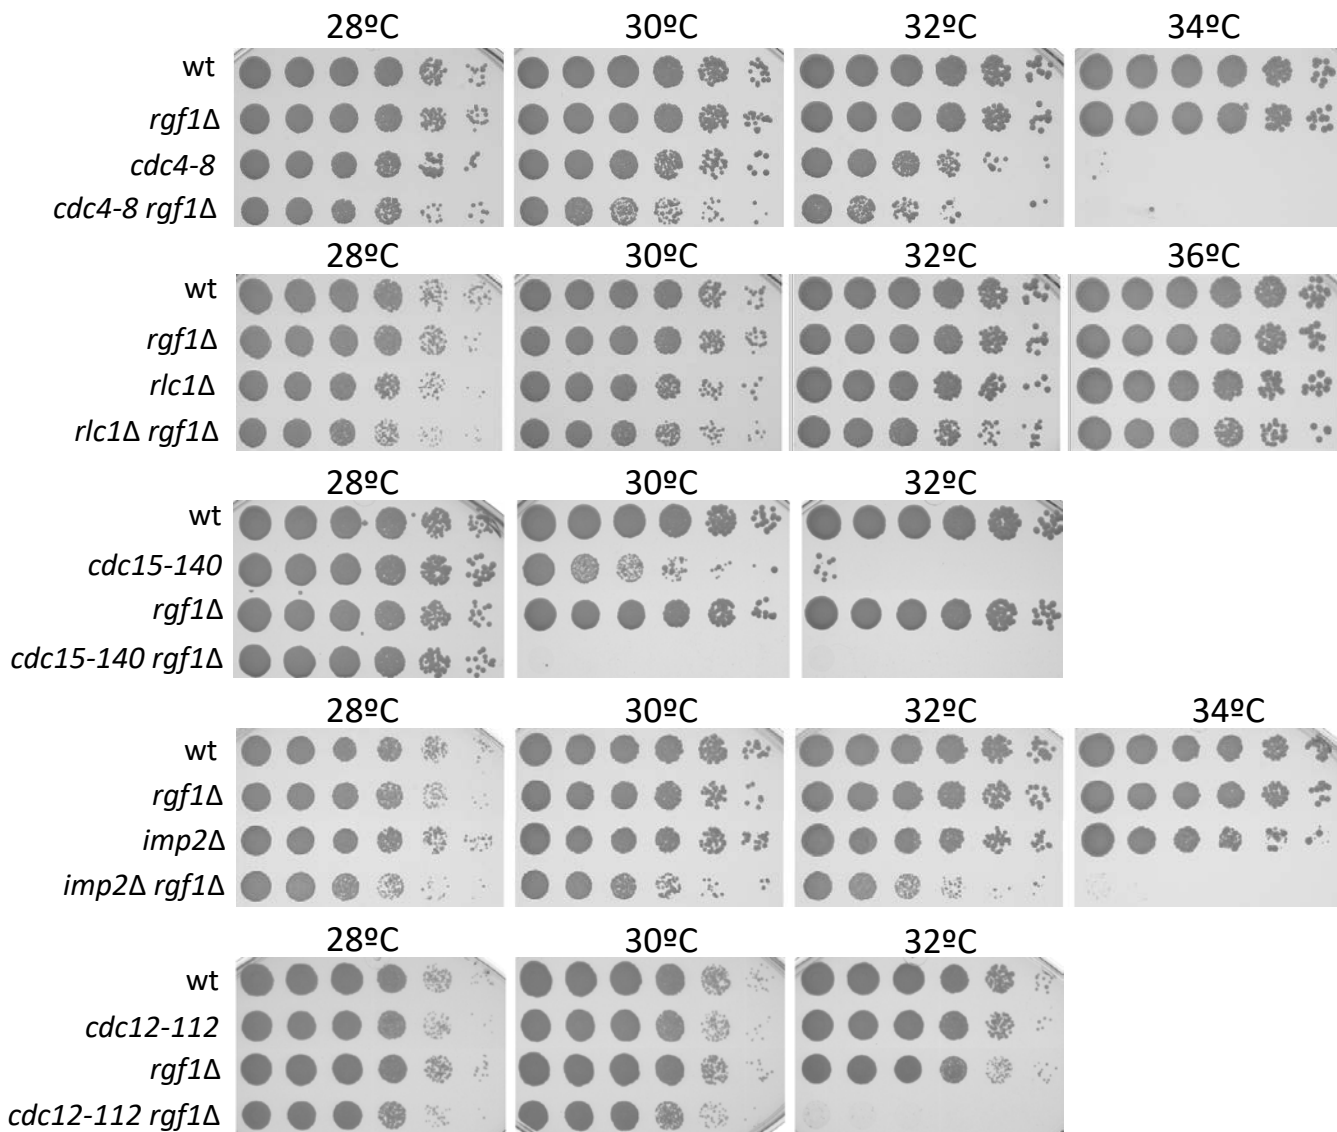

### Genetic interactions between Rgf1 null mutants and CAR mutants (Figure 1-figure supplement 2)

Serial dilutions (1:5) of the indicated strains were spotted on rich YES plates and incubated at 28°C, 30°C, 32°C, 34°C and 36°C. Colony formation was analyzed after 3 days.
