# Supplementary material for: A novel checkpoint pathway controls actomyosin ring constriction trigger in fission yeast
Source: eLife journal article supplement (doi:10.7554/elife.59333), 2020-10-26
Supplement: supp [file elife-59333-supp-v1.zip › elife_poa_e59333_Figure_2_figure_supplement_1.pdf]

Figure 2-figure supplement 1

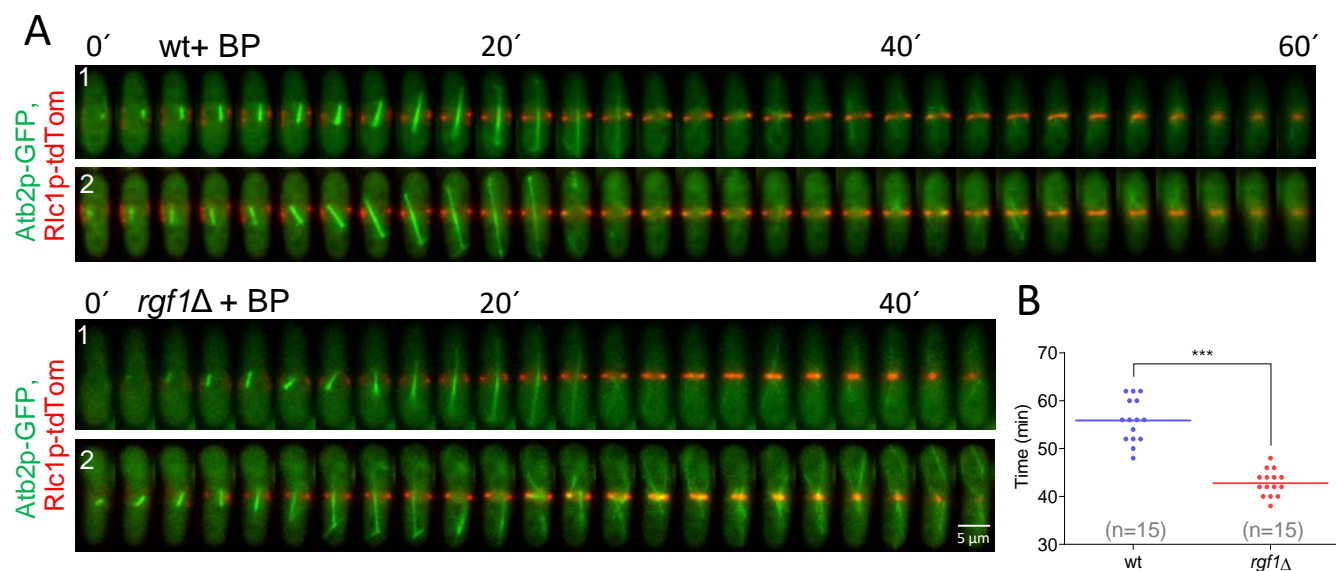

### Timing of cytokinesis in wild type and *rgf1Δ* cells treated with BP (Figure 2-figure supplement 1).

(A) Time-lapse series of wild type and *rgf1Δ* cells expressing Rlc1p-tdTomato as a contractile ring marker and Atb2-GFP as a cell cycle stage marker. Cells grown at 28°C were imaged in the presence of Blankophor (5μg/ml). (B) Quantitation of the timing of cytokinesis (from spindle formation until ring closure) in wild type (n=15) and *rgf1Δ* (n=15) individual cells is shown.
