# Supplementary material for: A novel checkpoint pathway controls actomyosin ring constriction trigger in fission yeast
Source: eLife journal article supplement (doi:10.7554/elife.59333), 2020-10-26
Supplement: supp [file elife-59333-supp-v1.zip › elife_poa_e59333_Figure_2_figure_supplement_1_source_data_1.xlsx]

## Sheet: Fig2 S1
Timing of cytokinesis in minutes from spindle formation until ring closure
wt	rgf1Δ		Unpaired t test
60	40		P value	<0.0001
56	42		P value summary	****
56	42		Significantly different (P < 0.05)?	Yes
48	42		One- or two-tailed P value?	Two-tailed
56	42		t, df	t=9.538, df=28
50	44		Mean of wt	55.87
56	40		Mean of rgf1Δ	42.8
62	44		Difference between means ± SEM	-13.07 ± 1.370
62	38		95% confidence interval	-15.87 to -10.26
60	46		R squared (eta squared)	0.7646
52	46
52	44
62	48
54	44
52	40
