# Supplementary material for: A novel checkpoint pathway controls actomyosin ring constriction trigger in fission yeast
Source: eLife journal article supplement (doi:10.7554/elife.59333), 2020-10-26
Supplement: supp [file elife-59333-supp-v1.zip › elife_poa_e59333_Figure_2_figure_supplement_2.pdf]

Figure 2-figure supplement 2

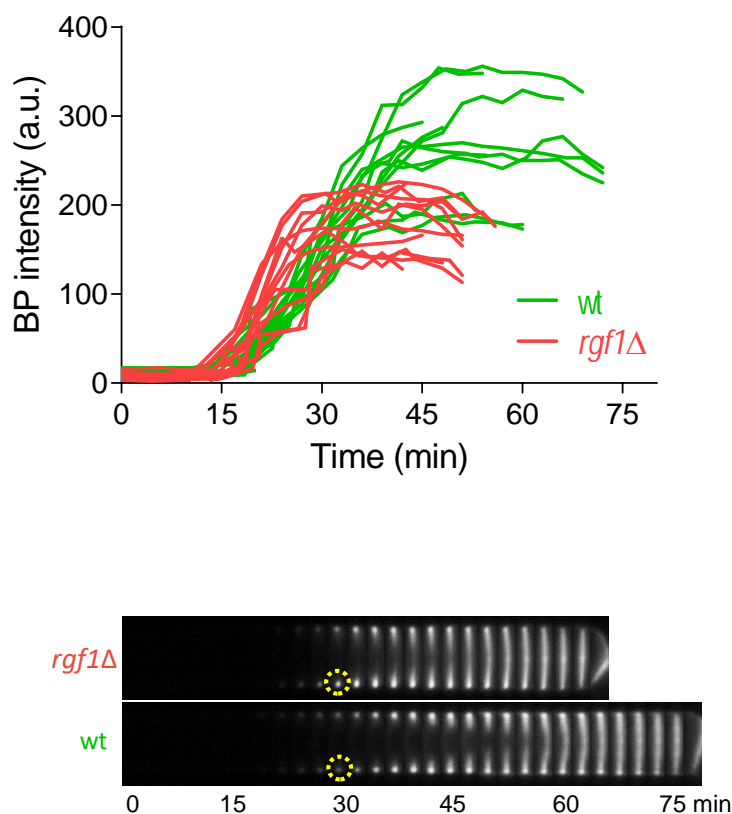

**Septum synthesis is not halted after BP treatment** (Figure 2-figure supplement 2).

Kymographs showing the progression of the septum of wild type and *rgf1Δ* cells treated with BP (5  $\mu\text{g/ml}$ ) and time-lapse-imaged every 3 min. ( $t=0$  indicates SPB separation, not shown). The graph represents BP fluorescence intensity in the septum area over time and was measured as the average fluorescence within a circle of constant diameter in the border of the cell (dotted circle). Each line represents a single septum.
