# Supplementary material for: A novel checkpoint pathway controls actomyosin ring constriction trigger in fission yeast
Source: eLife journal article supplement (doi:10.7554/elife.59333), 2020-10-26
Supplement: supp [file elife-59333-supp-v1.zip › elife_poa_e59333_Figure_2_figure_supplement_2_source_data_1.xlsx]

## Sheet: Fig2 S2
BP fluorescence intensity in the septum border over time, with time 0 at SPB separation
Time (min)	BP Intensity (a.u)
	wt													rgf1Δ
0	9	6	8	10	7	9	23	13	13	17	11	13		5	8	10	9	5	14	5	5	3	3	3	7
3	10	7	7	10	6	9	15	13	13	17	12	14		4	9	11	9	4	15	4	7	4	2	4	6
6	10	8	8	9	6	8	15	15	13	17	11	14		5	9	10	10	4	17	3	5	5	3	3	8
9	9	7	8	10	5	9	15	17	13	17	11	16		7	7	13	8	4	15	3	8	5	7	4	8
12	11	8	8	11	8	9	16	17	13	16	11	17		3	7	11	9	5	14	4	8	4	4	5	9
15	14	9	9	11	13	9	20	22	13	17	14	24		18	13	11	9	13	29	12	9	5	15	31	10
18	28	29	14	15	28	23	21	48	23	31	17	58		42	60	30	29	33	67	60	22	16	45	42	39
21	43	51	42	39	48	53	40	76	43	55	35	83		95	134	81	66	65	129	122	58	39	85	52	99
24	64	76	73	85	74	91	65	102	63	81	68	104		152	158	133	107	86	184	177	105	56	130	59	163
27	89	111	97	115	102	122	88	118	83	123	106	144		191	171	148	152	93	210	204	105	62	177	61	147
30	113	128	133	151	128	163	115	152	116	165	161	185		192	174	153	179	106	212	213	126	130	199	120	171
33	140	173	166	204	170	196	156	171	151	223	196	244		207	173	152	213	179	214	202	133	150	194	136	157
36	167	188	201	242	204	240	187	195	175	257	233	264		218	176	155	211	197	223	216	148	142	202	129	143
39	175	202	237	275	247	249	229	232	182	312	247	279		223	182	157	200	173	214	211	131	142	192	146	140
42	169	187	250	324	265	272	255	252	183	313	242	287		226	173	159	224	201	221	207	147	138	201	128	150
45	177	190	239	338	266	265	276	272	192	332	246	293		223	171	166		195	204	206	140	140	199		139
48	186	205	254	353	268	260	287	281	183	354	252			218	167			176	208	196	138	135	204		129
51	189	213	252	350	270	258		314	179	347	257			206	166			154	189	161	121		184		113
54	185	194	248	356	266	254		322	181	348	256			184									192
57	177		241	349	264	257		315	180														176
60	178		253	349	261	250		329	173
63			272	347	258	250		322
66			277	342	253	251		319
69			257	327	253	235
72			242		236	225
