# Supplementary material for: A novel checkpoint pathway controls actomyosin ring constriction trigger in fission yeast
Source: eLife journal article supplement (doi:10.7554/elife.59333), 2020-10-26
Supplement: supp [file elife-59333-supp-v1.zip › elife_poa_e59333_Figure_2_source_data_1.xlsx]

## Sheet: Fig 2C
Timing of cytokinesis in minutes from SPB separation to the end of actomyosin ring contraction
wt	rgf1Δ	wt+BP	rgf1Δ+BP		Sidak's multiple comparisons test	Mean Diff.	95.00% CI of diff.	Significant?	Summary	Adjusted P Value
42	39	63	45		wt vs. wt+BP	-18.18	-20.83 to -15.52	Yes	****	<0.0001
42	42	57	51		wt+BP vs. rgf1Δ+BP	11.57	8.872 to 14.26	Yes	****	<0.0001
42	48	63	57
39	42	54	48
39	39	60	48
39	48	63	57
42	39	69	48
39	42	54	51
45	36	54	51
42	39	60	54
42	42	57	39
39	36	66	45
42	33	60	42
42	42	72	51
45	39	60	42
45	39	69	45
39	36	63	63
48	42	63	48
39	42	66	42
39	45	51	45
42	39	57	63
39	39	57	51
42	39	51	45
48	39	63	48
42	36	51	48
42	36	57	54
39	36	48	54
39	36	69	60
36	42	51	42
42	45	51	39
42	42	72	42
42	39		51
45	39		54
42	42		45
42	39		45
45			39
39			45
45			57
45			42
39			39
39			39
39			48
42
42
39

## Sheet: Fig 2D
Timing of cytokinesis in minutes from SPB separation to the end of actomyosin ring contraction in wt cells
BP (µg/ml)					Sidak's multiple comparisons test	Mean Diff.	95.00% CI of diff.	Significant?	Summary	Adjusted P Value
0	2.5	5	10		0 vs. 2.5	-7.7	-12.34 to -3.056	Yes	***	0.0004
42	63	51	72		0 vs. 5	-16.82	-21.77 to -11.86	Yes	****	<0.0001
39	54	54	66		0 vs. 10	-26.17	-31.13 to -21.22	Yes	****	<0.0001
42	45	51	57
39	51	63	72
39	42	54	75
42	45	54	90
42	48	51	66
42	45	81	51
42	45	63	66
45	51	60	69
39	48	54	57
39	48	54	66
39	54	63	69
39	54	57	84
42	51	72	81
39	54	57	54
39	48	66	69
42	48
42	51
45	60
48	45
51
42
42
45
45
48
45
42
42

## Sheet: Fig 2E
Percentage of cells treated with 5µg/ml BP in which ring contraction is completely blocked (at least 45 minutes without noticeable progression)
Exp	wt	rgf1Δ
15-05-18	19	0
17-05-18	21	0
21-05-18	7	0
