# Supplementary material for: A novel checkpoint pathway controls actomyosin ring constriction trigger in fission yeast
Source: eLife journal article supplement (doi:10.7554/elife.59333), 2020-10-26
Supplement: supp [file elife-59333-supp-v1.zip › elife_poa_e59333_Figure_3_figure_supplement_1.pdf]

Figure 3-figure supplement 1

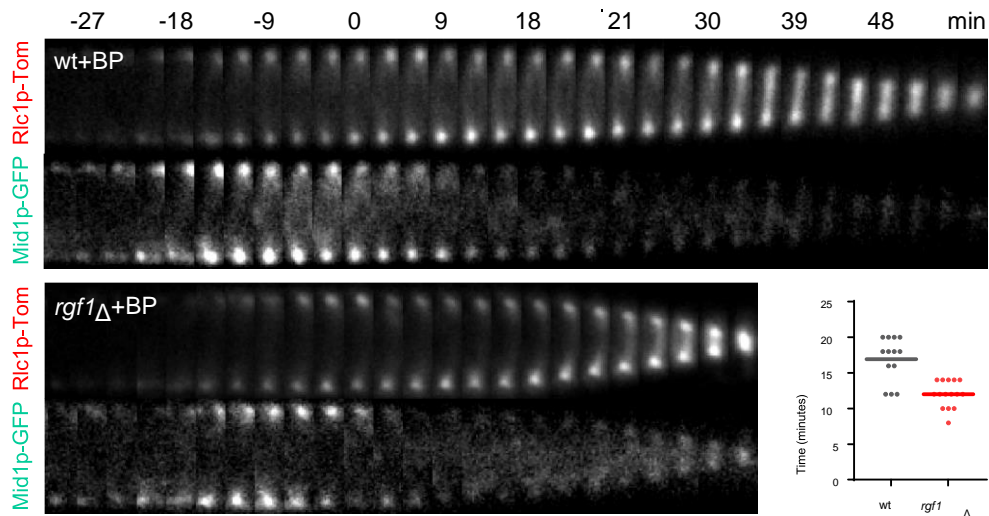

**Mid1p-EGFP dissociated prematurely from the ring in *rgf1Δ* cells** (Figure 3-figure supplement 1).

Kymographs of Rlc1p-tdTom and Mid1p-GFP in wild type and *rgf1Δ* cells treated with BP (5  $\mu$ g/ml) and time-lapse-imaged every 3 min. (t=0 indicates BP septum signal appearance, not shown). Quantitation of the timing of Mid1p-GFP disappearance from the ring (from BP septum signal) in wild type (n=13) and *rgf1Δ* (n=15) individual cells.
