# Supplementary material for: A novel checkpoint pathway controls actomyosin ring constriction trigger in fission yeast
Source: eLife journal article supplement (doi:10.7554/elife.59333), 2020-10-26
Supplement: supp [file elife-59333-supp-v1.zip › elife_poa_e59333_Figure_3_figure_supplement_1_source_data_1.xlsx]

## Sheet: Fig3 S1
Timing of Mid1-GFP disappearance from the ring (from BP septum signal)
wt	rgf1		Unpaired t test
18	14		P value	<0,0001
16	14		P value summary	****
20	14		Significantly different (P < 0.05)?	Yes
18	14		One- or two-tailed P value?	Two-tailed
20	12		t, df	t=5,158 df=26
20	12		Mean ± SEM of column A	16,92 ± 0,8657, n=13
12	12		Mean ± SEM of column B	12 ± 0,4781, n=15
18	10		Difference between means	-4,923 ± 0,9544
16	10		95% confidence interval	-6,885 to -2,961
12	14		R squared (eta squared)	0.5058
12	10
18	12
20	12
	8
	12
