# Supplementary material for: A novel checkpoint pathway controls actomyosin ring constriction trigger in fission yeast
Source: eLife journal article supplement (doi:10.7554/elife.59333), 2020-10-26
Supplement: supp [file elife-59333-supp-v1.zip › elife_poa_e59333_Figure_3_source_data_1.xlsx]

## Sheet: Fig 3B
Time in minutes taken for various steps in cytokinesis (coalescence of nodes into a ring, dwell time before contraction and contraction)
Formation					Maturation					Constriction					Sidak's multiple comparisons test	Mean Diff.	99.00% CI of diff.	Significant?	Summary	Adjusted P Value
wt	wt +BP	rgf1Δ	rgf1Δ +BP		wt	wt +BP	rgf1Δ	rgf1Δ+BP		wt	wt +BP	rgf1Δ	rgf1Δ+BP		Formation wt vs. wt +BP	2.024	-1.001 to 5.049	No	ns	0.1879
18	24	12	21		9	18	9	12		18	18	18	15		Formation rgf1Δ vs. rgf1Δ +BP	-1.79	-4.854 to 1.274	No	ns	0.3269
21	21	18	21		9	21	9	18		18	18	15	15		Maturation wt vs. wt +BP	-12.32	-15.43 to -9.215	Yes	****	<0.0001
21	21	21	21		9	15	6	12		21	21	21	18		Maturation rgf1Δ vs. rgf1D+BP	-2.534	-5.598 to 0.5303	No	ns	0.053
21	18	15	21		9	21	15	9		21	18	15	15		Constriction wt vs. wt +BP	0.08036	-3.026 to 3.187	No	ns	>0.9999
18	15	18	21		12	24	12	12		15	21	15	18		Constriction rgf1Δ vs. rgf1Δ+BP	0.6933	-2.371 to 3.757	No	ns	0.9781
21	15	18	21		9	27	9	12		15	15	18	15
21	21	21	21		6	24	9	12		21	15	18	15
24	18	15	21		15	18	9	9		15	21	21	15
18	18	15	21		6	30	12	9		21	15	15	15
24	15	18	18		12	27	6	12		18	21	18	18
21	15	18	18		18	21	9	12		18	24	15	18
21	21	27	21		6	21	6	12		21	18	15	15
24	21	18	18		9	21	9	9		18	21	15	15
21	18	21	18		9	21	6	9		21	18	15	18
18		18			9		9			18		15
21		18			9		9			24		18
18		21					6					18
21

## Sheet: Fig 3C
Ring diameter in µm over time, with time 0 min at SPB separation
Time (min)	wt YES																																							rgf1Δ YES
0
3
6
9
12
15	3.68	3.566		3.611	3.585	3.93	3.574	3.735	3.456	3.744		3.724	3.613	3.6	3.587		3.536	3.508		3.609	3.71	3.343	3.3	3.532	3.373	3.435	3.475	3.795	3.343	3.273	3.603	3.579	3.608	3.636		3.519	3.628	3.492		2.965	3.01		3.577	3.158	3.184	3.102	3.189	3.44	3.619
18	3.572	3.566	3.566	3.633	3.54	3.8	3.538	3.754	3.556	3.751	3.799	3.635	3.613	3.467	3.597	3.561	3.702	3.536	3.566	3.601	3.666	3.411	3.217	3.61	3.484	3.28	3.327	3.699	3.32	3.163	3.589	3.564	3.714	3.605	3.533	3.509	3.639	3.485		3.199	3.099	3.32	3.418	3.229	3.271	3.167	3.184	3.316	3.56
21	3.566	3.562	3.522	3.566	3.663	3.834	3.534	3.68	3.463	3.707	3.746	3.45	3.597	3.647	3.516	3.604	3.528	3.528	3.465	3.623	3.647	3.26	3.104	3.501	3.416	3.226	3.294	3.487	3.296	3.284	3.44	3.424	3.657	3.359	3.586	3.489	3.605	3.429		3.139	3.22	3.37	3.203	3.108	3.183	3.19	3.216	3.378	3.542
24	3.355	3.354	3.348	3.463	3.531	3.5	3.358	3.466	3.296	3.456	3.528	3.048	3.368	3.481	3.616	3.392	3.256	3.159	3.083	3.334	3.42	3.128	2.926	3	3.087	2.9	3.183	3.14	3.218	3.209	3.153	3.144	3.275	2.961	3.584	3.39	3.306	3.334		2.928	3.014	3.318	2.765	2.908	3.227	3.004	3.076	3.309	3.405
27	2.962	3.087	2.946	3.07	3.08	3.138	3.101	3.173	2.992	3.092	3.195	2.673	3.09	3.266	3.266	3.005	2.879	2.709	2.72	2.988	3.083	2.709	2.679	2.688	2.574	2.434	2.764	2.706	2.918	2.811	2.75	2.757	2.791	2.544	3.3	3.173	2.759	3.019		2.506	2.596	3.224	2.378	2.334	2.989	2.493	2.768	2.804	3.195
30	2.575	2.774	2.55	2.551	2.695	2.839	2.77	2.861	2.562	2.53	2.735	2.255	2.638	2.935	2.936	2.612	2.472	2.198	2.188	2.586	2.636	2.21	2.241	2.251	2.013	1.971	2.321	2.111	2.536	2.348	2.392	2.252	2.331	2.036	3.033	2.828	2.239	2.657		2.046	2.078	2.943	2.029	1.909	2.57	1.944	2.453	2.304	2.808
33	2.259	2.481	2.12	2.098	2.271	2.375	2.541	2.422	2.192	2.136	2.321	1.595	2.346	2.653	2.553	2.147	2.141	1.632	1.541	2.202	2.165	1.774	1.795	1.61	1.459	1.346	1.858	1.498	2.04	1.711	1.988	1.659	1.839	1.539	2.535	2.412	1.661	2.294		1.483	1.602	2.487	1.692	1.331	2.254	1.378	2.056	1.747	2.366
36	1.74	2.119	1.648	1.446	1.706	1.781	2.079	1.97	1.613	1.572	1.754	0.971	1.77	2.271	2.04	1.606	1.745	0.888	0.829	1.63	1.619	1.097	1.175	0.954	0.736	0.735	1.348	0.916	1.643	1.185	1.354	1.067	1.224	1.043	1.955	1.996	0.844	1.779		0.883	1.098	2.001	1.208	0.614	1.923	0.876	1.433	1.274	1.872
39	1.18	1.576	1.069	0.839	1.214	1.36	1.765	1.341	1.063	0.958	1.238	0	1.217	1.774	1.708	1.043	1.174	0	0	1.227	0.975	0.356	0.619	0	0	0	0.752	0	1.03	0.522	0.781	0	0.392	0.368	1.408	1.493	0	1.379		0	0.417	1.594	0.77	0	1.525	0	0.872	0.489	1.374
42	0.724	1.106	0	0	0.61	0.599	1.303	0.909	0.354	0	0.65		0.514	1.31	1.276	0	0.54			0.65	0	0	0				0		0.406	0	0		0	0	0.894	0.998		0.916			0	1.105	0		1.238		0	0	1.068
45	0	0.68			0	0	0.384	0	0		0		0	0.846	0.767		0			0									0						0	0		0.442				0.638			0.842				0.621
48		0					0							0.366	0																							0				0			0				0
51														0
54
57
60
63
66
69
72
[truncated: 66 more columns]
