# Supplementary material for: A novel checkpoint pathway controls actomyosin ring constriction trigger in fission yeast
Source: eLife journal article supplement (doi:10.7554/elife.59333), 2020-10-26
Supplement: supp [file elife-59333-supp-v1.zip › elife_poa_e59333_Figure_4_figure_supplement_1.pdf]

Figure 4-figure supplement 1

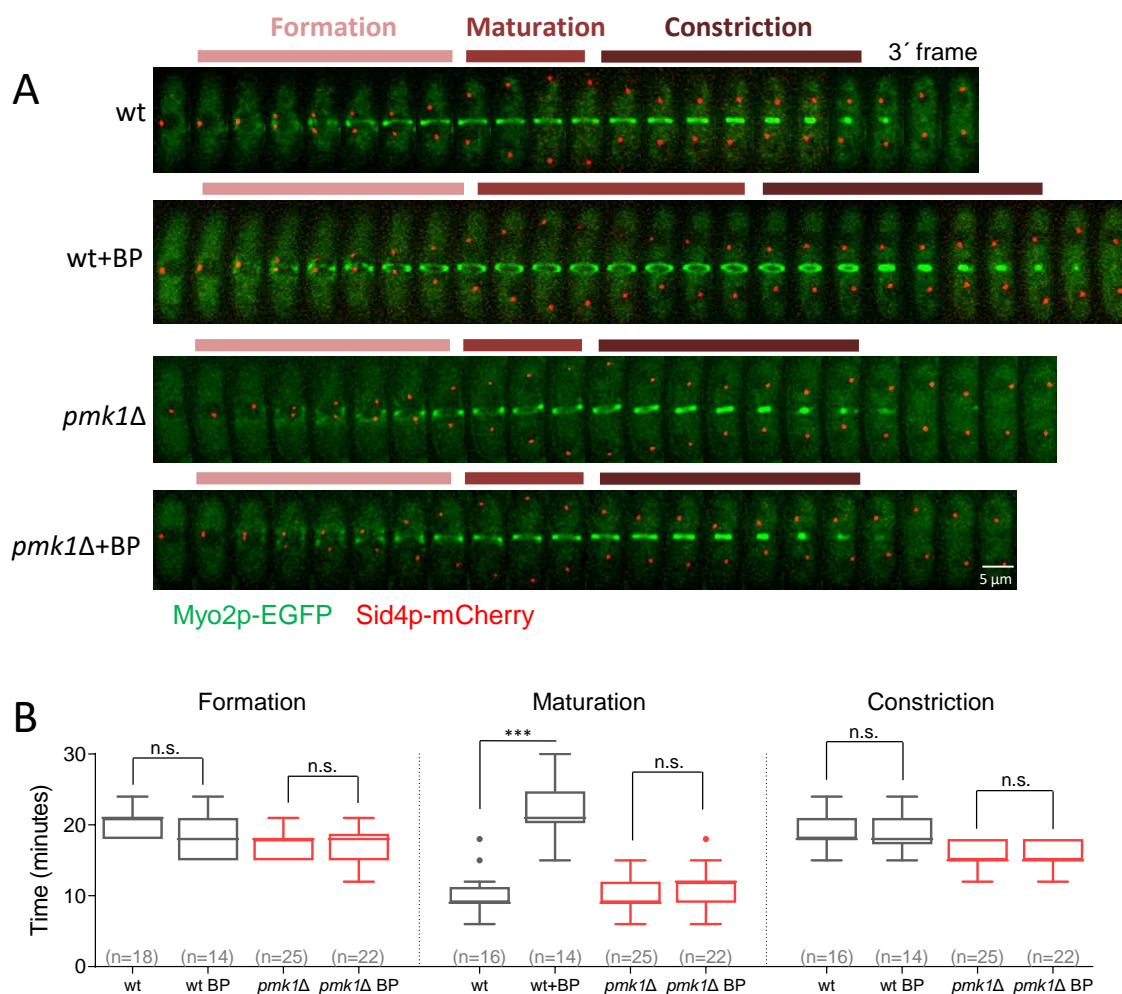

**Pmk1p delays the onset of ring constriction in cells treated with BP** (Figure 4-figure supplement1).

(A) Time lapse series of wild type and *pmk1Δ* cells expressing Myo2p-EGFP and Sid4p-mCherry. Cells were grown at 28°C and BP (5μg/ml) was added before imaging when indicated in the panel. Images shown are maximum-intensity projections of z stacks. (B) The time taken for various steps in cytokinesis (coalescence of nodes into a ring, dwell time before contraction and contraction). Quantification of (A) is shown. Boxes represents the IQR, whiskers are the Tukey's range and the line inside the box is the median. Asterisks indicate the statistical significance of the difference between the two conditions. Statistical significance was calculated by ANOVA followed by Šidák's multiple comparisons test (n.s.  $p > 0.05$ ; \*\*\* $p < 0.0001$ ).
