# Supplementary material for: A novel checkpoint pathway controls actomyosin ring constriction trigger in fission yeast
Source: eLife journal article supplement (doi:10.7554/elife.59333), 2020-10-26
Supplement: supp [file elife-59333-supp-v1.zip › elife_poa_e59333_figure_4_figure_supplement_1_source_data_1.xlsx]

## Sheet: Fig4 S1
Time in minutes taken for various steps in cytokinesis (coalescence of nodes into a ring, dwell time before contraction and contraction)
Formation					Maturation					Constriction					Sidak's multiple comparisons test	Mean Diff.	99.00% CI of diff.	Significant?	Summary	Adjusted P Value
wt	wt +BP	pmk1Δ	pmk1Δ +BP		wt	wt +BP	pmk1Δ	pmk1Δ +BP		wt	wt +BP	pmk1Δ	pmk1Δ +BP		Formation wt vs. wt +BP	2.024	-0.9029 to 4.950	No	ns	0.1609
18	24	18	15		9	18	9	12		18	18	15	15		Formation pmk1Δ vs. pmk1Δ +BP	0.3545	-2.046 to 2.755	No	ns	0.9978
21	21	18	21		9	21	9	9		18	18	18	18		Maturation wt vs. wt +BP	-12.32	-15.33 to -9.316	Yes	****	<0.0001
21	21	18	18		9	15	9	9		21	21	15	15		Maturation pmk1Δ vs. pmk1Δ +BP	-1.189	-3.590 to 1.212	No	ns	0.5243
21	18	18	18		9	21	12	9		21	18	15	18		Constriction wt vs. wt +BP	0.08036	-2.925 to 3.086	No	ns	>0.9999
18	15	15	12		12	24	12	9		15	21	15	18		Constriction pmk1Δ vs. pmk1Δ +BP	0.1255	-2.275 to 2.526	No	ns	>0.9999
21	15	18	18		9	27	12	15		15	15	15	12
21	21	18	18		6	24	9	9		21	15	18	15
24	18	21	15		15	18	6	12		15	21	18	18
18	18	18	15		6	30	12	12		21	15	18	15
24	15	15	18		12	27	9	9		18	21	15	18
21	15	18	15		18	21	6	15		18	24	15	18
21	21	18	15		6	21	9	18		21	18	12	12
24	21	15	21		9	21	9	6		18	21	15	18
21	18	21	12		9	21	9	12		21	18	18	15
18		15	18		9		9	12		18		18	15
21		15	15		9		15	12		24		15	15
18		18	15				6	15				18	15
21		21	21				9	6				18	15
		15	21				12	9				15	15
		15	21				9	12				18	15
		15	18				12	6				18	18
		18	15				9	12				15	18
		18					9					15
		18					12					15
		18					9					15
