# Supplementary material for: A novel checkpoint pathway controls actomyosin ring constriction trigger in fission yeast
Source: eLife journal article supplement (doi:10.7554/elife.59333), 2020-10-26
Supplement: supp [file elife-59333-supp-v1.zip › elife_poa_e59333_Figure_4_figure_supplement_2.pdf]

Figure 4-figure supplement 2

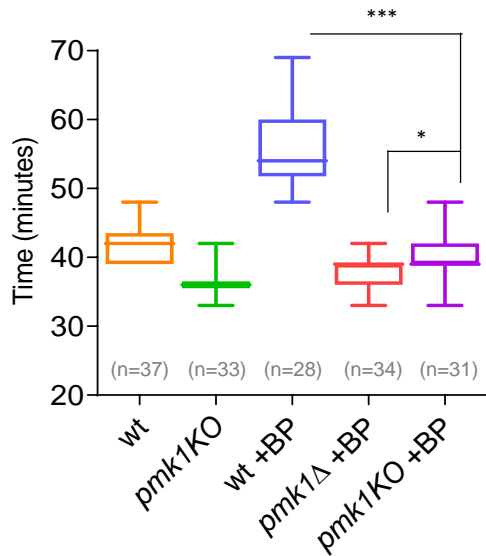

#### Timing of cytokinesis in *pmk1-KO* cells treated with BP (Figure 4-figure supplement 2)

Quantitation of the timing of cytokinesis in wild type, *pmk1Δ* and *pmk1-KO* cells expressing Imp2p-GFP/Sid4p-GFP. Cells were grown at 28°C and a time-lapse was carried out with or w/o BP (5μg/ml), added before imaging. Statistical significance was calculated by ANOVA followed by Šídák's multiple comparisons test (n.s.  $p > 0.05$ ; \*  $p < 0.05$ ; \*\*\*  $p < 0.0001$ ).
