# Supplementary material for: A novel checkpoint pathway controls actomyosin ring constriction trigger in fission yeast
Source: eLife journal article supplement (doi:10.7554/elife.59333), 2020-10-26
Supplement: supp [file elife-59333-supp-v1.zip › elife_poa_e59333_Figure_4_figure_supplement_2_source_data_1.xlsx]

## Sheet: Fig4 S2
Timing of cytokinesis in minutes from SPB separation to the end of actomyosin ring contraction
wt	pmk1KO	wt +BP	pmk1Δ +BP	pmk1KO +BP		Sidak's multiple comparisons test	Mean Diff.	95.00% CI of diff.	Significant?	Summary	Adjusted P Value
42	36	57	39	33		wt +BP vs. pmk1KO +BP	15.62	13.67 to 17.56	Yes	****	<0.0001
39	36	60	33	48		pmk1Δ +BP vs. pmk1KO +BP	-2.271	-4.127 to -0.4156	Yes	*	0.0128
39	36	60	39	45
39	36	51	42	39
45	36	66	42	48
42	36	48	42	45
42	36	57	36	45
42	33	54	36	45
39	36	51	39	39
42	36	51	39	36
42	39	63	36	39
39	36	66	36	39
45	36	57	39	39
45	36	63	42	42
42	36	54	36	39
42	36	54	39	39
42	39	54	39	39
45	36	57	36	42
45	33	54	39	39
45	36	54	36	36
42	36	51	39	39
39	36	60	36	36
45	36	54	39	39
39	39	69	39	36
45	36	57	39	48
42	42	54	42	42
39	42	51	39	42
39	36	51	36	39
39	39		39	42
42	36		39	42
48	33		39	42
39	33		36
39	36		39
39			42
42
39
42
