# Supplementary material for: A novel checkpoint pathway controls actomyosin ring constriction trigger in fission yeast
Source: eLife journal article supplement (doi:10.7554/elife.59333), 2020-10-26
Supplement: supp [file elife-59333-supp-v1.zip › elife_poa_e59333_Figure_4_figure_supplement_3.pdf]

Figure 4-figure supplement 3

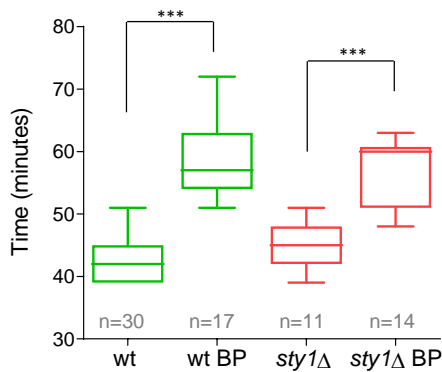

**Timing of cytokinesis in *sty1Δ* cells treated with BP (Figure 4-figure supplement 3).**

Quantitation of the timing of cytokinesis (from SPB separation to the end of AR contraction) in *sty1Δ* and wild-type cells expressing Imp2p-GFP (CAR marker) and Sid4p-GFP (mitotic marker). Cells were grown at 28°C and a time lapse was done in the presence or the absence of BP (5μg/ml) added before imaging. Asterisks indicate the statistical significance of the difference between the two conditions. Statistical significance was calculated by ANOVA followed by Fisher's LSD test (\*\*p < 0.0001).
