# Supplementary material for: A novel checkpoint pathway controls actomyosin ring constriction trigger in fission yeast
Source: eLife journal article supplement (doi:10.7554/elife.59333), 2020-10-26
Supplement: supp [file elife-59333-supp-v1.zip › elife_poa_e59333_Figure_4_figure_supplement_3_source_data_1.xlsx]

## Sheet: Fig4 S3
Timing of cytokinesis in minutes from SPB separation to the end of actomyosin ring contraction
wt	wt BP	sty1Δ	sty1Δ BP		Uncorrected Fisher's LSD	Mean Diff.	95.00% CI of diff.	Significant?	Summary	Individual P Value
42	51	42	63		wt vs. wt BP	-16.82	-19.96 to -13.67	Yes	****	<0.0001
39	54	51	57		sty1Δ vs. sty1Δ BP	-11.88	-16.06 to -7.710	Yes	****	<0.0001
42	51	51	60
39	63	45	51
39	54	45	57
42	54	48	60
42	51	48	63
42	81	39	60
42	63	45	48
45	60	42	51
39	54	45	60
39	54		51
39	63		60
39	57		63
42	72
39	57
39	66
42
42
45
48
51
42
42
45
45
48
45
42
42
