# Supplementary material for: A novel checkpoint pathway controls actomyosin ring constriction trigger in fission yeast
Source: eLife journal article supplement (doi:10.7554/elife.59333), 2020-10-26
Supplement: supp [file elife-59333-supp-v1.zip › elife_poa_e59333_Figure_4_figure_supplement_4.pdf]

Figure 4-figure supplement 4

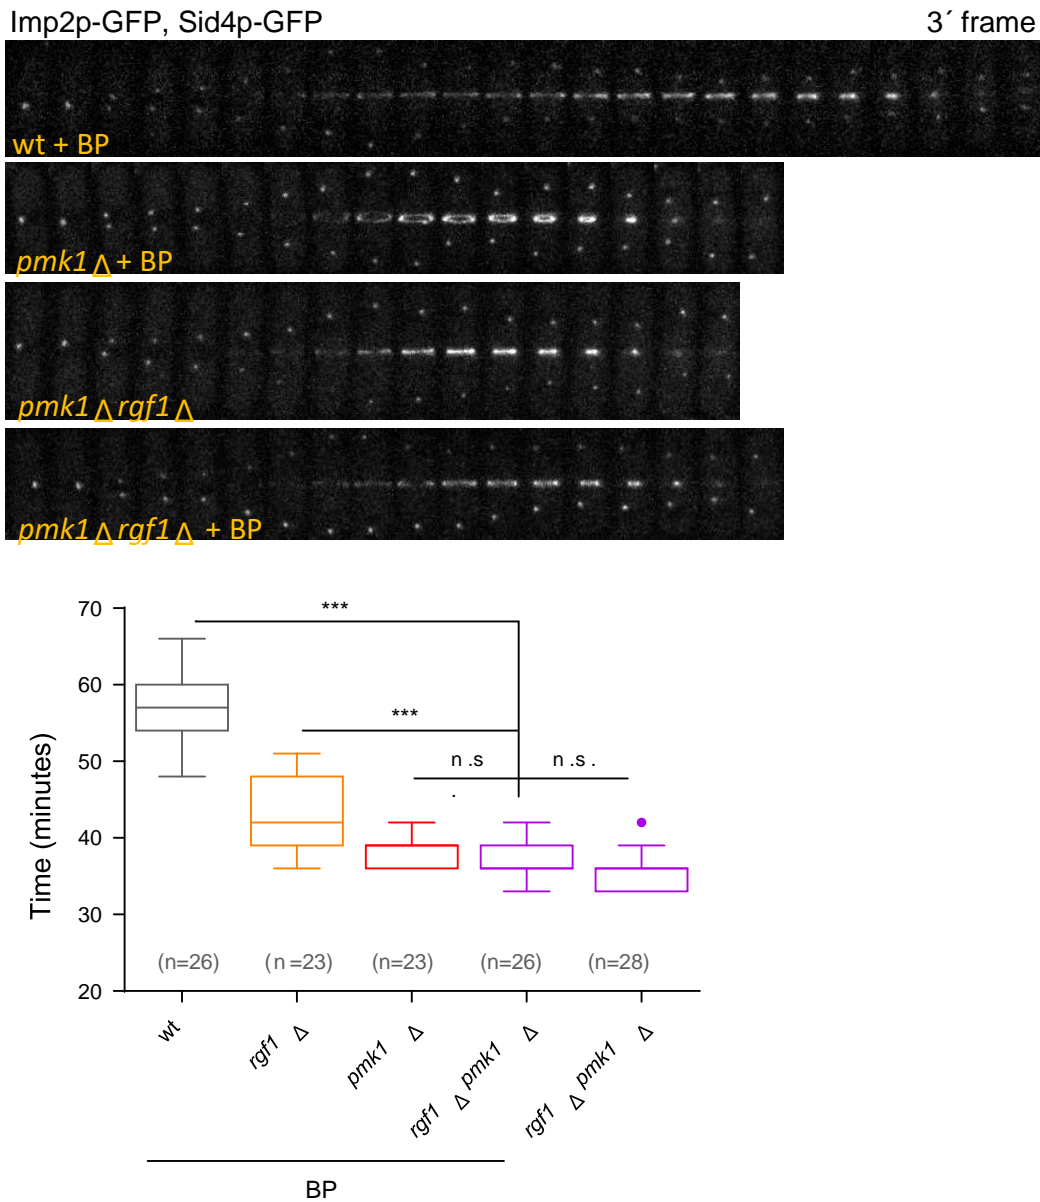

#### Timing of cytokinesis in *rgf1* $\Delta$ *pmk1* $\Delta$ cells treated with BP (Figure 4-figure supplement 4).

Time-lapse representative series and quantitation of the timing of cytokinesis (from SPB separation to the end of CAR contraction) in wild type, *rgf1* $\Delta$ , *pmk1* $\Delta$  and *rgf1* $\Delta$  *pmk1* $\Delta$  cells expressing Imp2p-GFP and Sid4p-GFP. Cells were grown at 28°C and a time-lapse analysis was carried out in the presence or the absence of BP (5 $\mu$ g/ml) when indicated. Asterisks indicate the statistical significance of the difference between the two conditions. Statistical significance was calculated by ANOVA followed by Šídák's multiple comparisons test (n.s.  $p > 0.05$ ; \*\*\* $p < 0.0001$ ).
