# Supplementary material for: A novel checkpoint pathway controls actomyosin ring constriction trigger in fission yeast
Source: eLife journal article supplement (doi:10.7554/elife.59333), 2020-10-26
Supplement: supp [file elife-59333-supp-v1.zip › elife_poa_e59333_figure_4_figure_supplement_4_source_data_1.xlsx]

## Sheet: Fig4 S4
Timing of cytokinesis in minutes from SPB separation to the end of actomyosin ring contraction
BP	BP	BP	BP	-		Sidak's multiple comparisons test	Mean Diff.	95.00% CI of diff.	Significant?	Summary	Adjusted P Value
wt	rgf1	pmk1	rgf1 pmk1	rgf1 pmk1		rgf1 pmk1 BP vs. wt BP	-19.96	-22,36 to -17,56	Yes	****	<0,0001
54	39	39	36	33		rgf1 pmk1 BP vs. pmk1 BP	-1.294	-3,77 to 1,181	No	ns	0.5668
66	45	39	39	33		rgf1 pmk1 BP vs. rgf1 pmk1	1.566	-0,7896 to 3,921	No	ns	0.3303
57	42	39	39	33		rgf1 pmk1 BP vs. rgf1 BP	-6.381	-8,857 to -3,906	Yes	****	<0,0001
48	45	42	39	33
66	48	36	39	36
54	48	42	39	33
57	45	39	33	33
60	39	36	36	39
63	48	39	39	42
57	42	36	39	33
54	45	39	33	33
66	51	36	39	33
51	39	39	33	33
54	39	39	36	39
63	42	36	36	36
54	39	36	39	39
60	39	36	42	36
57	36	39	36	36
51	42	39	36	36
51	39	39	33	36
57	45	36	36	36
60	48	39	39	36
57	51	39	33	36
54			36	36
51			39	36
57			36	33
				36
				36
