# Supplementary material for: A novel checkpoint pathway controls actomyosin ring constriction trigger in fission yeast
Source: eLife journal article supplement (doi:10.7554/elife.59333), 2020-10-26
Supplement: supp [file elife-59333-supp-v1.zip › elife_poa_e59333_Figure_4_figure_supplement_5.pdf]

Figure 4-figure supplement 5

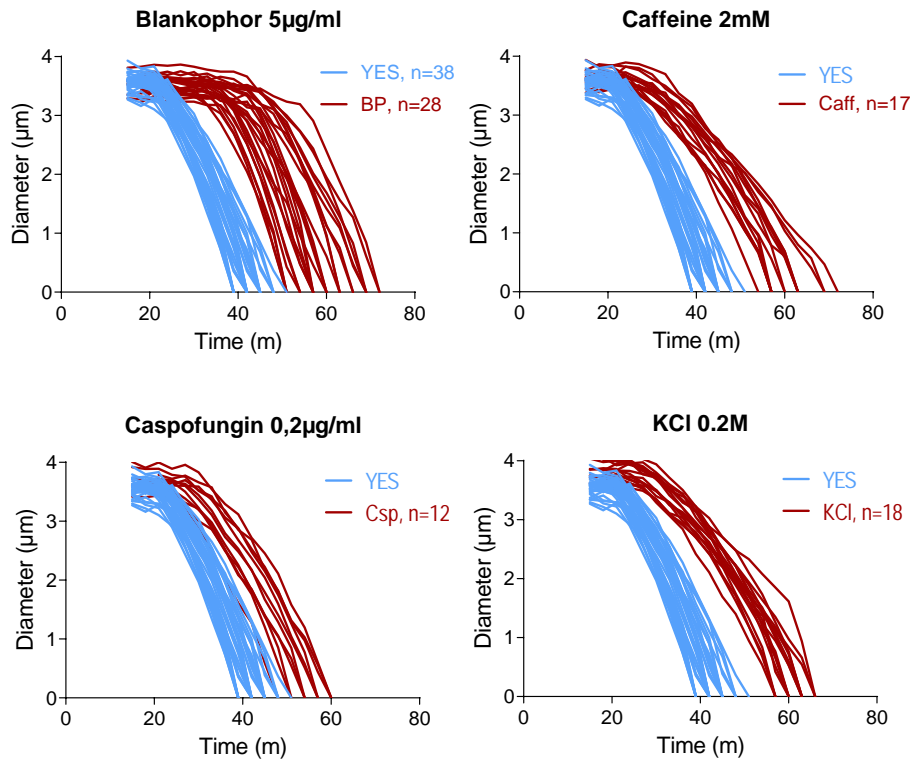

**Contractile ring constriction in wild type cells treated with BP, caffeine, caspofungin and KCl (Figure 4-figure supplement 5)**

Time course of the constriction of the contractile ring of wild-type cells expressing Imp2p-GFP/Sad1p-GFP, in the presence of the stress indicated (red) or without stress (blue), measured as the ring diameter. (t=0 was SPB separation).
