# Supplementary material for: A novel checkpoint pathway controls actomyosin ring constriction trigger in fission yeast
Source: eLife journal article supplement (doi:10.7554/elife.59333), 2020-10-26
Supplement: supp [file elife-59333-supp-v1.zip › elife_poa_e59333_figure_4_figure_supplement_5_source_data_1.xlsx]

## Sheet: Fig4 S5
Ring diameter in µm over time, with time 0 min at SPB separation
Time (min)	Ring diameter (µm)
	YES																																							Blankophor 5µg/ml
0
3
6
9
12
15	3.68	3.566		3.611	3.585	3.93	3.574	3.735	3.456	3.744		3.724	3.613	3.6	3.587		3.536	3.508		3.609	3.71	3.343	3.3	3.532	3.373	3.435	3.475	3.795	3.343	3.273	3.603	3.579	3.608	3.636		3.519	3.628	3.492							3.578				3.588
18	3.572	3.566	3.566	3.633	3.54	3.8	3.538	3.754	3.556	3.751	3.799	3.635	3.613	3.467	3.597	3.561	3.702	3.536	3.566	3.601	3.666	3.411	3.217	3.61	3.484	3.28	3.327	3.699	3.32	3.163	3.589	3.564	3.714	3.605	3.533	3.509	3.639	3.485		3.477	3.374	3.707	3.226	3.555	3.534	3.685	3.569	3.275	3.558
21	3.566	3.562	3.522	3.566	3.663	3.834	3.534	3.68	3.463	3.707	3.746	3.45	3.597	3.647	3.516	3.604	3.528	3.528	3.465	3.623	3.647	3.26	3.104	3.501	3.416	3.226	3.294	3.487	3.296	3.284	3.44	3.424	3.657	3.359	3.586	3.489	3.605	3.429		3.477	3.404	3.614	3.333	3.591	3.554	3.633	3.592	3.406	3.603
24	3.355	3.354	3.348	3.463	3.531	3.5	3.358	3.466	3.296	3.456	3.528	3.048	3.368	3.481	3.616	3.392	3.256	3.159	3.083	3.334	3.42	3.128	2.926	3	3.087	2.9	3.183	3.14	3.218	3.209	3.153	3.144	3.275	2.961	3.584	3.39	3.306	3.334		3.546	3.407	3.559	3.37	3.623	3.42	3.547	3.6	3.394	3.625
27	2.962	3.087	2.946	3.07	3.08	3.138	3.101	3.173	2.992	3.092	3.195	2.673	3.09	3.266	3.266	3.005	2.879	2.709	2.72	2.988	3.083	2.709	2.679	2.688	2.574	2.434	2.764	2.706	2.918	2.811	2.75	2.757	2.791	2.544	3.3	3.173	2.759	3.019		3.457	3.348	3.591	3.279	3.61	3.371	3.599	3.567	3.356	3.625
30	2.575	2.774	2.55	2.551	2.695	2.839	2.77	2.861	2.562	2.53	2.735	2.255	2.638	2.935	2.936	2.612	2.472	2.198	2.188	2.586	2.636	2.21	2.241	2.251	2.013	1.971	2.321	2.111	2.536	2.348	2.392	2.252	2.331	2.036	3.033	2.828	2.239	2.657		3.411	3.364	3.52	3.307	3.637	3.328	3.553	3.54	3.354	3.573
33	2.259	2.481	2.12	2.098	2.271	2.375	2.541	2.422	2.192	2.136	2.321	1.595	2.346	2.653	2.553	2.147	2.141	1.632	1.541	2.202	2.165	1.774	1.795	1.61	1.459	1.346	1.858	1.498	2.04	1.711	1.988	1.659	1.839	1.539	2.535	2.412	1.661	2.294		3.491	3.321	3.542	3.289	3.598	3.184	3.58	3.521	3.343	3.611
36	1.74	2.119	1.648	1.446	1.706	1.781	2.079	1.97	1.613	1.572	1.754	0.971	1.77	2.271	2.04	1.606	1.745	0.888	0.829	1.63	1.619	1.097	1.175	0.954	0.736	0.735	1.348	0.916	1.643	1.185	1.354	1.067	1.224	1.043	1.955	1.996	0.844	1.779		3.51	3.329	3.461	3.302	3.658	2.871	3.487	3.389	3.159	3.543
39	1.18	1.576	1.069	0.839	1.214	1.36	1.765	1.341	1.063	0.958	1.238	0	1.217	1.774	1.708	1.043	1.174	0	0	1.227	0.975	0.356	0.619	0	0	0	0.752	0	1.03	0.522	0.781	0	0.392	0.368	1.408	1.493	0	1.379		3.46	3.274	3.486	3.123	3.617	2.477	3.449	3.159	2.807	3.529
42	0.724	1.106	0	0	0.61	0.599	1.303	0.909	0.354	0	0.65		0.514	1.31	1.276	0	0.54			0.65	0	0	0				0		0.406	0	0		0	0	0.894	0.998		0.916		3.432	3.369	3.514	2.993	3.472	2.048	3.373	2.745	2.277	3.477
45	0	0.68			0	0	0.384	0	0		0		0	0.846	0.767		0			0									0						0	0		0.442		3.459	3.196	3.397	2.701	3.428	1.527	2.98	2.245	1.681	3.217
48		0					0							0.366	0																							0		3.327	3.104	3.149	2.365	3.126	0.988	2.402	1.729	1.034	2.847
51														0																										3.236	2.832	2.759	2.025	2.887	0	1.766	1.154	0	2.692
54																																								3.191	2.454	2.259	1.564	2.407		1.036	0.63		2.254
57																																								2.911	2.018	1.694	1.075	1.96		0	0		1.72
60																																								2.393	1.688	1.122	0.607	1.565					0.942
63																																								1.88	1.278	0.755	0	1.16					0
66																																								1.381	0.832	0		0.445
69																																								0.845	0			0
72																																								0
[truncated: 65 more columns]
