# Supplementary material for: A novel checkpoint pathway controls actomyosin ring constriction trigger in fission yeast
Source: eLife journal article supplement (doi:10.7554/elife.59333), 2020-10-26
Supplement: supp [file elife-59333-supp-v1.zip › elife_poa_e59333_Figure_4_source_data_1.xlsx]

## Sheet: Fig 4C
Timing of cytokinesis in minutes from SPB separation to the end of actomyosin ring contraction
wt	pmk1Δ	rho2Δ	pck1Δ	pck2Δ		wt +BP	pmk1Δ +BP	rho2Δ +BP	pck1Δ +BP	pck2Δ +BP		Sidak's multiple comparisons test	Mean Diff.	95.00% CI of diff.	Significant?	Summary	Adjusted P Value
39	48	39	42	45		63	42	60	57	45		wt +BP vs. pmk1Δ +BP	-15.21	-18.91 to -11.51	Yes	****	<0.0001
39	42	39	45	51		57	42	54	54	42		wt +BP vs. rho2Δ +BP	2.51	-0.9761 to 5.995	No	ns	0.2553
45	42	42	42	45		63	42	57	60	54		wt +BP vs. pck1Δ +BP	3.995	-0.3873 to 8.378	No	ns	0.0883
42	48	42	45	48		54	45	54	57	48		wt +BP vs. pck2Δ +BP	15.5	11.53 to 19.46	Yes	****	<0.0001
42	45	42	48	45		60	42	54	48	54
42	42	42	45	48		63	48	69	51	45
42	48	39	48	45		69	42	63	51	42
42	42	39	42	45		54	45	69	60	51
39	45	45	45	48		54	42	51	69	42
39	45	45	45	45		60	42	57	54	45
39	48	39	48	48		57	48	57	51	39
39	48	39	48	48		66	48	60	63	39
42	42	39		48		60	51	60	60	42
39	48	45		45		72	42	51	45	42
39	42	39		48		60	45	51		39
42	45	42				69	42	54		45
42	48	42				63	45	54		42
48	48	42				63	48	51		42
42	48	42				66	45	57		42
39	42	39				51	42	57
42	45	42				57	45	63
39	39	42				57	42	51
39	45					51	48	51
42	48					63	45	60
42	45					51		57
42	42					57		69
42	42					48		54
45	45					69		57
39						51		60
39						51		54
39						72
39
42
39
39
42
42
45
48
51
42
42
45
45
48
45
42
42

## Sheet: Fig 4D
Timing of cytokinesis in minutes from SPB separation to the end of actomyosin ring contraction @36ºC
wt	rho1-596	wt +BP	rho1-596 +BP		Unpaired t test, wt +BP vs. rho1-596 +BP
27	30	48	42		P value	<0.0001
30	30	39	36		P value summary	****
30	27	48	39		Significantly different (P < 0.05)?	Yes
27	27	45	33		One- or two-tailed P value?	Two-tailed
30	30	39	36		t, df	t=6.790, df=53
27	27	39	33		Mean of wt +BP	46.5
24	30	45	33		Mean of column rho1-596 +BP	36.48
24	27	45	33		Difference between means ± SEM	-10.02 ± 1.476
27	27	45	36		95% confidence interval	-12.98 to -7.060
30	27	51	33		R squared (eta squared)	0.4652
27	27	48	36
30	27	51	36
27	27	51	36
33	30	42	33
27	30	48	36
24	27	63	39
27	30	54	33
27	27	48	39
27	30	57	42
33	27	42	36
30		39	39
30		45	39
30		45	36
30		48	42
27		39	36
		39
		45
		39
		66
		42

## Sheet: Fig 4E
Timing of cytokinesis in minutes from SPB separation to the end of actomyosin ring contraction with BP 5µ/ml
wt	rgf1Δ	rgf1-PTTR		Uncorrected Fisher's LSD	Mean Diff.	95.00% CI of diff.	Significant?	Summary	Individual P Value
60	39	48		wt vs. rgf1Δ	17.39	14.18 to 20.59	Yes	****	<0.0001
60	45	39		wt vs. rgf1-PTTR	19.44	15.99 to 22.89	Yes	****	<0.0001
54	42	45
57	45	42
69	48	39
57	48	36
60	45	36
75	39	42
63	48	39
63	42	48
57	45	42
60	51	39
54	39	39
	39	39
	42	42
	39	45
	39
	36
	42
	39
	45
	48
	51

## Sheet: Fig 4G
Timing of cytokinesis in minutes from SPB separation to the end of actomyosin ring contraction
wt YES	rgf1Δ YES	pmk1Δ YES	wt BP	rgf1Δ BP	pmk1Δ BP	wt Caf	rgf1Δ Caf	pmk1Δ Caf	wt Csp	rgf1Δ Csp	pmk1Δ Csp	wt KCl	rgf1Δ KCl	pmk1Δ KCl		Uncorrected Fisher's LSD	Mean Diff.	95.00% CI of diff.	Significant?	Summary	Individual P Value
45	39	48	63	51	42	48	42	48	54	51	45	72	69	51		wt BP vs. rgf1Δ BP	12.05	9.651 to 14.45	Yes	****	<0.0001
48	48	42	57	51	42	54	60	42	51	51	63	63	63	51		wt BP vs. pmk1Δ BP	15.21	12.56 to 17.86	Yes	****	<0.0001
51	51	42	63	54	42	63	51	45	48	54	51	75	60	51		wt Caf vs. rgf1Δ Caf	5.4	2.190 to 8.610	Yes	**	0.001
42	42	48	54	39	45	66	51	42	66	51	66	75	69	54		wt Caf vs. pmk1Δ Caf	15.99	12.73 to 19.25	Yes	****	<0.0001
42	51	45	60	45	42	69	57	42	60	51	48	78	60	48		wt Csp vs. rgf1Δ Csp	-4.027	-7.547 to -0.5072	Yes	*	0.025
45	42	42	63	42	48	60	63	45	57	51	42	66	78	51		wt Csp vs. pmk1Δ Csp	-7.434	-10.75 to -4.118	Yes	****	<0.0001
45	39	48	69	51	42	69	57	42	54	54	48	66	69	51		wt KCl vs. rgf1Δ KCl	-0.54	-4.237 to 3.157	No	ns	0.7741
48	48	42	54	42	45	63	63	48	51	57	51	66	57	48		wt KCl vs. pmk1Δ KCl	13.36	10.13 to 16.59	Yes	****	<0.0001
45	51	45	54	45	42	60	51	39	57	48	51	66	60	48
42	51	45	60	63	42	57	54	42	57	63	48	60	60	51
42	48	48	57	48	48	57	63	45	60	42	45	57		51
45	42	51	66	42	48	63	60	45	60	48	60	60		54
42	45	48	60	45	51	63	60	42	54	42	51	60		51
42	36	51	72	63	42	63	51	42		60	42	63		48
45	39	42	60	51	45	48	45	42		60	45	63		51
45	42	48	69	45	42	57	45	42		54	54	63
45	48	42	63	48	45	57	51	45		57	51	57
42	42	51	63	48	48	57	48			48	42	66
45	39	45	66	54	45	57				51	45	60
42	48	48	51	54	42	57				48	45	63
42	39	48	57	60	45						48	57
42	42	48	57	42	42						48	60
45	36	42	51	39	48						57	63
45	39	45	63	42	45						45	63
42	42	39	51	51							45	57
48	36	45	57	54							42
45	42	48	48	45							39
48	39	45	69	45							45
45	39	42	51	39
42	36	42	51	45
42	42	45	72	57
42	42	42		42
42	45	48		39
39	39	48		39
39	39	45		48
39	39	39
42	39	45
39	36	39
45	36	42
42	36	45
42	36	42
39	51	42
42	42	42
42	39	42
45	45	45
45	48	42
39	45	42
48	42	42
45	39	39
39	39	48
45	42	48
48	51	48
48	42	42
42	39	42
51		39
45		39
45		48
48		42
39		36
39		45
45

## Sheet: Fig 4H
Timing of cytokinesis in minutes from SPB separation to the end of actomyosin ring contraction @36ºC
wt	pmk1Δ	cwg1-1	cwg1-1 pmk1Δ		Unpaired t test
30	27	27	27		P value	<0.0001
27	24	30	24		P value summary	****
27	24	33	24		Significantly different (P < 0.05)?	Yes
30	24	33	33		One- or two-tailed P value?	Two-tailed
27	24	33	27		t, df	t=7.321, df=67
24	27	30	27		Mean of cwg1-1	30.93
30	24	30	33		Mean of cwg1-1 pmk1Δ	26.7
30	24	30	27		Difference between means ± SEM	-4.231 ± 0.5780
30	24	33	27		95% confidence interval	-5.385 to -3.077
27	27	33	27		R squared (eta squared)	0.4444
27	24	30	27
27	27	33	27
27	24	30	24
30	27	27	27
30	27	36	27
27	24	30	30
27	24	33	27
27	24	30	24
27	24	27	27
30	24	30	27
30	24	30	30
30	24	30	27
30	24	33	24
30	24	30	27
27	24	27	30
27	27	36	24
27	24	33	27
27	27	30	24
30	24	30	24
27	24		24
30	24		24
27	27		24
30	27		27
27	24		30
27	27		27
30	27		24
30	24		27
30	27		27
30	24		27
30	30		27
30	24
30	24
30	24
33
27
30
30
30
30
27
30
30
27
30
30
