# Supplementary material for: A novel checkpoint pathway controls actomyosin ring constriction trigger in fission yeast
Source: eLife journal article supplement (doi:10.7554/elife.59333), 2020-10-26
Supplement: supp [file elife-59333-supp-v1.zip › elife_poa_e59333_Figure_6_figure_supplement_1.pdf]

Figure 6-figure supplement 1

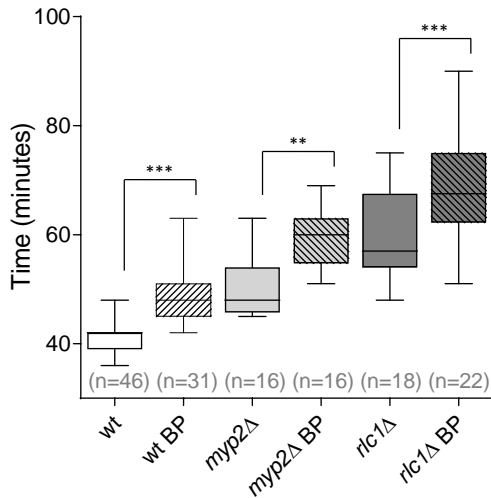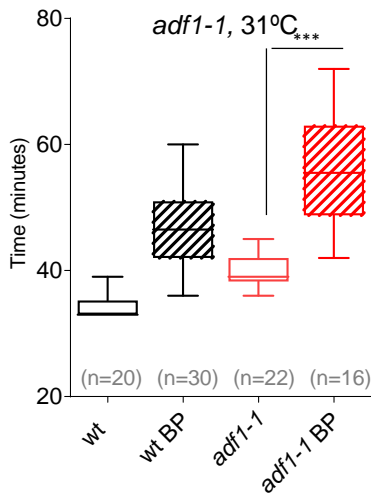

### Timing of cytokinesis in *myp2Δ*, *rlc1Δ* and *adf1-1* mutant cells (Figure 6-figure supplement 1).

Quantitation of the timing of cytokinesis in wild-type and mutant cells expressing Imp2p-GFP and Sid4p-GFP were grown and a time-lapse was done under the conditions established for each mutant. *myp2Δ* and *rlc1Δ* cells were grown at 28°C and a time-lapse was done in the presence or absence of BP (5μg/ml). *adf1-1* cells were grown at 25°C and shifted to 31°C 1h before time-lapse imaging in the presence or absence of BP (5μg/ml). Asterisks indicate the statistical significance of the difference between strains. Statistical significance was calculated by ANOVA followed by Šidák's multiple comparisons test (n.s.  $p > 0.05$ ; \*\*  $p < 0.005$ ; \*\*\*  $p < 0.0001$ ).
