# Supplementary material for: A novel checkpoint pathway controls actomyosin ring constriction trigger in fission yeast
Source: eLife journal article supplement (doi:10.7554/elife.59333), 2020-10-26
Supplement: supp [file elife-59333-supp-v1.zip › elife_poa_e59333_Figure_6_figure_supplement_1_source_data_1.xlsx]

## Sheet: Fig6 S1A
Timing of cytokinesis in minutes from SPB separation to the end of actomyosin ring contraction
wt	wt BP	myp2Δ	myp2Δ BP	rlc1Δ	rlc1Δ BP		Sidak's multiple comparisons test	Mean Diff.	95.00% CI of diff.	Significant?	Summary	Adjusted P Value
39	45	54	60	48	63		wt BP vs. wt	8.495	4.897 to 12.09	Yes	****	<0.0001
39	48	57	51	66	66		myp2Δ BP vs. myp2Δ	9.188	3.713 to 14.66	Yes	***	0.0002
36	54	51	63	54	51		rlc1Δ vs. rlc1Δ BP	-8.955	-13.88 to -4.033	Yes	****	<0.0001
42	45	48	69	48	60
42	60	45	51	54	75
39	48	60	60	54	75
39	45	51	57	60	75
42	48	54	63	75	75
42	51	48	60	57	66
39	51	48	54	72	66
42	48	63	69	54	63
42	42	48	57	48	81
42	51	45	63	57	90
39	63	45	66	60	69
42	42	48	63	72	63
36	45	45	51	57	72
39	51			60	75
39	51			75	60
42	57				51
42	54				51
48	45				75
42	48				84
39	48
48	42
39	57
42	42
39	48
42	51
45	51
45	51
36	51
36
45
45
42
42
45
39
39
36
39
39
45
39
42
42

## Sheet: Fig6 S1B
Timing of cytokinesis in minutes from SPB separation to the end of actomyosin ring contraction @31ºC
wt	wt BP	adf1-1	adf1-1 BP		Sidak's multiple comparisons test	Mean Diff.	95.00% CI of diff.	Significant?	Summary	Adjusted P Value
33	39	36	45		wt vs. wt BP	-13	-16.64 to -9.362	Yes	****	<0.0001
33	45	42	69		adf1-1 vs. adf1-1 BP	-15.84	-19.98 to -11.69	Yes	****	<0.0001
36	54	45	54
33	42	39	42
33	42	39	63
33	45	39	45
33	54	39	60
36	45	36	60
33	39	42	51
36	60	39	72
33	51	42	63
33	45	42	51
33	54	45	57
33	36	45	48
33	39	42	51
36	54	36	66
33	42	42
33	51	39
39	48	36
33	42	36
	48	39
	57	45
	51
	51
	45
	42
	51
	48
	39
	48
