# Supplementary material for: A novel checkpoint pathway controls actomyosin ring constriction trigger in fission yeast
Source: eLife journal article supplement (doi:10.7554/elife.59333), 2020-10-26
Supplement: supp [file elife-59333-supp-v1.zip › elife_poa_e59333_Figure_6_figure_supplement_2.pdf]

Figure 6-figure supplement 2

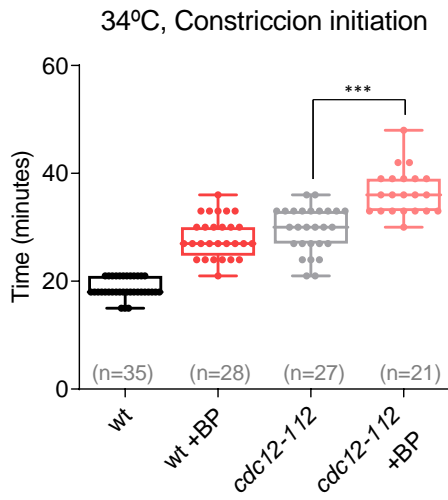

**Constriction initiation in *cdc12-112* cells** (Figure 6-figure supplement 2).

Time taken for the initiation of constriction in wild-type and *cdc12-112* cells grown at 28°C and shifted to 34°C 1h before time-lapse imaging in the presence or absence of BP. (t=0 is SPB separation). Asterisks indicate the statistical significance of the difference between strains. Statistical significance was calculated by ANOVA followed by Šídák's multiple comparisons test (n.s.  $p > 0.05$ ; \*\*  $p < 0.005$ ; \*\*\*  $p < 0.0001$ ).
