# Supplementary material for: A novel checkpoint pathway controls actomyosin ring constriction trigger in fission yeast
Source: eLife journal article supplement (doi:10.7554/elife.59333), 2020-10-26
Supplement: supp [file elife-59333-supp-v1.zip › elife_poa_e59333_Figure_6_figure_supplement_2_source_data_1.xlsx]

## Sheet: Fig6 S2
Time in minutes from SPB separation to the initiation of ring constriction @34ºC
wt	wt +BP	cdc12-112	cdc12-112 +BP		Sidak's multiple comparisons test	Mean Diff.	95.00% CI of diff.	Significant?	Summary	Adjusted P Value
18	33	21	36		wt vs. wt +BP	-9.407	-11.41 to -7.406	Yes	****	<0.0001
21	33	21	33		cdc12-112 vs. cdc12-112 +BP	-7.016	-9.313 to -4.719	Yes	****	<0.0001
21	30	36	39
18	36	27	39
21	27	30	48
18	27	24	42
21	30	33	39
21	24	27	36
18	33	30	39
18	30	27	36
15	33	33	39
18	30	27	33
18	30	33	33
18	33	30	42
21	30	27	33
21	21	36	36
18	27	24	33
18	27	33	30
21	24	24	36
18	24	30	33
15	24	33	33
18	27	33
18	27	33
15	24	33
18	27	30
18	27	33
18	27	30
21	24
18
18
18
21
21
18
21
