# Supplementary material for: A novel checkpoint pathway controls actomyosin ring constriction trigger in fission yeast
Source: eLife journal article supplement (doi:10.7554/elife.59333), 2020-10-26
Supplement: supp [file elife-59333-supp-v1.zip › elife_poa_e59333_Figure_6_source_data_1.xlsx]

## Sheet: Fig 6B
Relative nuclear intensity of GFP over time, starting at SPB separation
Raw intensity (a.u.)
Time (min)	YES													BP
0	131432	133275	135062	134988	137310	125597	129685	128454	126957	134135	135194	130129		131678	129278	125520	133776	136467	135473	137521	139072	133449	133275	132787	133012
3	128632	132347	131926	133356	132561	125605	129685	125921	125581	132329	133504	128593		128392	127939	123274	133174	131839	131889	133714	137121	130819	129194	132315	132102
6	128071	131351	131749	128817	131489	123765	129244	125191	123658	129697	131055	126290		126233	124162	122137	131058	130892	129399	132476	134439	127885	127242	128194	129356
9	126740	130063	128448	127973	129719	121510	124196	124106	122950	127583	129452	124805		125223	123597	121665	126710	129173	128887	130445	132332	127217	126598	127940	126616
12	125313	129211	127780	127559	129360	120337	124007	123040	123103	126896	129143	125790		124461	122193	121572	126032	127740	128638	129086	130517	127489	125084	126342	124900
15	124111	127756	127903	127666	128646	120202	123718	122159	122894	125741	128441	125299		124104	122277	121408	125771	126483	128082	127800	129925	126777	124857	125347	124306
18	123710	126860	128335	126017	127359	119738	122821	121945	122070	124619	125966	124415		123513	122370	120981	125242	126088	127394	126265	129355	126227	125264	124489	124098
21	122730	125988	128674	125347	126651	118815	121542	121005	120063	123271	125544	124722		122512	122399	119862	123377	123817	126430	125003	128963	125502	123974	125104	123358
24	122040	126447	127377	124080	126279	119176	120745	120259	121367	123820	125526	125149		121016	121302	120268	124159	126553	125792	123117	127515	124204	123621	125474	122986
27	122487	127876	126482	125767	127706	119469	121281	121473	121778	123720	125802	125333		120872	121474	120251	124645	125634	126259	125395	130029	124545	123669	125625	123934
30	122831	127084	126556	127132	126971	118708	121847	121824	121798	124300	125946	126028		121339	121894	120030	124772	127043	126653	126198	130852	125137	123870	125864	124043
33	123640	127928	127040	127644	127188	119687	122765	122338	122736	125465	126843	126536		121482	121626	119369	125701	127189	127006	126943	130687	125003	124229	125732	124445
36	124358	128211	127732	128363	127589	119977	123270	123144	123974	125673	127666	126976		120812	121728	119898	124936	126997	127177	126174	130855	125804	125217	125847	124904
39	125508	129601	127842	128971	128019	120540	123994	123580	123648	126881	127752	127216		120984	122213	120432	124581	126973	127043	126184	131478	124423	124369	125975	126240
42	125304	129760	129294	129784	128986	121502	124487	124660	124723	127249	129775	128833		121453	121917	120799	125138	127084	126424	125684	131112	124209	124609	126175	127533
45	126897	130719	129956	130047	130700	122264	124996	124914	125979	128621	130044	129336		121481	121902	121845	125014	127396	126764	125990	132041	124298	124587	126112	127426
48	127809	131693	130977	132291	130714	123167	126365	126931	127565	130289	131579	130688		122392	122342	121986	125514	128030	126117	126726	132284	123946	124390	127132	127652
51	127633	131288	133016	132675	132512	123341	126682	128394	128938	131205	132731	131026		121480	123012	122782	126618	128417	126863	127454	131512	124498	124710	127813	127483
54	128870	132040	133599	132594	132939	123174	127452	127640	128791	132576	132417	131000		123482	123281	123308	126274	128592	127708	127403	131442	124080	125106	127489	128782
57	129985	132334	133719	132883	133534	123657	128206	127708	128946	133362	133202	131277		123903	122674	124634	127905	129533	128813	127517	132122	124451	125003	129584	128882
60	130465	132173	133666	133205	133135	122850	127056	127491	128148	131621	134005			124513	123995	124654	128501	130040	129478	129082	132178	125390	125809	129916	129659
63	130874	131707	133019	134133	132995	123097	127005	123553	128489	132161	134504			124890	126257	125226	128085	129872	129885	129885	132928	126750	126524	130927	130780
66	129913	131881	131861	134218	130271	122870	127240	126980	128570	132386	135125			125117	128287	123854	128889	132647	131773	128414	133036	127630	126975	131800	132548
69	130555	131445	132642	132174	129817	123102	126539	127339	128519	132240	135782			125470	129479	124027	130944	133576	133999	129294	134203	127550	127566	131954	132140
72	130847	131624	133180	133301	129029	122990	126896	127609	128776	132718	135128			125552	128671	124124	130797	134130	134546	132143	134279	128592	127658	132247	130921
75	130598	132487	132962	130929	130910	123032	126082	127600	127866	132407	135257				128949	124840	130685	134124	134013	132368	135814	129621	130629	129190
78	130528	133117	132706	130859	131931	123352	126316	128322	128376	132242	135527				129187	124976	130642	134213	134181	132531	136488	129977	129889	130369
81	130411	131223	132381	131695			126801	126879	128961	132686	135830					125054	130019	134266	136020	132953	137822	130063	130058	129766
84	130621																130223	133944	135608	132955	136908	129682	129469	130508
87																	130587	133854	135995	133483	138253	128531	130248	132309
90																	129480	132644	135357	133012	138778	129585	130642	133306
93																	129438	133079	134579	132870	139020	129902	130419	132132
Normalized (%)
Time (min)	YES													BP
0	100	100	100	100	100	99.884	100	100	77.4781	100	93.8276	83.2702		100	97.5419	100	100	100	94.6519	100	100	100	100	94.1137	100
3	70.1874	87.265	63.4499	85.0385	56.9486	100	100	69.0909	62.0139	83.3763	77.4262	60.886		69.7589	81.1667	63.4856	94.211	63.415	59.6109	73.5698	83.1184	72.3245	57.7274	88.7604	90.9236
6	64.2142	73.5968	61.3869	43.4268	47.2305	73.3217	95.0671	60.183	40.4023	59.1495	53.6588	27.3244		49.8896	34.9761	45.0008	73.8629	55.9288	35.2659	64.975	59.9117	41.4501	37.5078	42.0211	63.5348
9	50.0426	55.9215	22.9138	35.6894	31.1848	40.6264	38.6018	46.9433	32.4455	39.6907	38.1017	5.68347		40.5945	28.0665	37.3273	32.0512	42.3399	30.2601	50.8748	41.6804	34.4207	30.837	39.1403	36.2059
12	34.8488	44.2294	15.1282	31.894	27.9304	23.619	36.4877	33.9353	34.165	33.3671	35.1029	20.0379		33.5818	10.8964	35.8153	25.5313	31.0119	27.8256	41.4399	25.9756	37.283	15.1543	21.0162	19.0904
15	22.0507	24.2624	16.5618	32.8749	21.4577	21.6616	33.255	23.1849	31.8161	22.7356	28.29	12.8825		30.2963	11.9237	33.1491	23.0214	21.0751	22.3895	32.5118	20.8532	29.7906	12.803	9.7312	13.1658
18	17.7811	11.9665	21.5967	17.7576	9.79059	14.934	23.2215	20.5735	22.5556	12.4079	4.27019	0		24.8574	13.061	26.2071	17.9344	17.9526	15.6629	21.855	15.9211	24.0029	17.0189	0	11.0912
21	7.34668	0	25.5478	11.6153	3.37231	1.5514	8.91499	9.10311	0	0	0.174689	4.47391		15.6451	13.4157	8.01496	0	0	6.23778	13.0936	12.5292	16.3738	3.65652	6.97516	3.71035
24	0	6.29889	10.4312	0	0	6.78556	0	0	14.655	5.05339	0	10.6966		1.87742	0	14.6155	7.51995	21.6285	0	0	0	2.71493	0	11.1716	0
27	4.75937	25.9092	0	15.4657	12.9363	11.0338	5.99553	14.8139	19.274	4.13292	2.67857	13.378		0.552181	2.10346	14.3391	12.1935	14.3636	4.5659	15.815	21.7531	6.30327	0.497203	12.8842	9.45542
30	8.42206	15.0405	0.862471	27.9795	6.27323	0	12.3266	19.097	19.4988	9.47165	4.07609	23.5063		4.84999	7.23982	10.7462	13.4147	25.502	8.41807	21.3899	28.8743	12.5329	2.57924	15.5949	10.5426
33	17.0358	26.6227	6.5035	32.6733	8.24041	14.1946	22.5951	25.3691	30.0405	20.1951	12.7814	30.9094		6.16602	3.96233	0	22.3483	26.6561	11.8694	26.5621	27.4466	11.1228	6.29791	14.0978	14.5522
36	24.6806	30.5064	14.5688	39.2648	11.8756	18.3993	28.2438	35.2044	43.9537	22.1097	20.7686	37.3215		0	5.20973	8.60023	14.9918	25.1383	13.5413	21.2233	28.9002	19.5517	16.532	15.4021	19.1303
39	36.925	49.5814	15.8508	44.8387	15.7737	26.5623	36.3423	40.5247	40.2899	33.229	21.6033	40.819		1.58292	11.141	17.2817	11.578	24.9486	12.2311	21.2927	34.2909	5.01947	7.74808	16.8538	32.4556
42	34.753	51.7634	32.7739	52.2919	24.5399	40.5104	41.8568	53.7035	52.3713	36.6163	41.2364	64.3836		5.89914	7.5211	23.2482	16.9343	25.8261	6.17912	17.8214	31.124	2.76755	10.2341	19.1222	45.3521
45	51.7142	64.9238	40.4895	54.703	40.078	51.5587	47.5503	56.8029	66.4869	49.2452	43.8471	71.7138		6.15682	7.33765	40.2536	15.7419	28.2925	9.50333	19.9459	39.1624	3.70409	10.0062	18.4076	44.2849
48	61.4246	78.2901	52.3893	75.275	40.2049	64.6513	62.8635	81.4155	84.3111	64.5987	58.7442	91.4165		14.5408	12.7186	42.5459	20.55	33.3043	3.17755	25.0555	41.265	0	7.96561	29.9762	46.539
51	59.5507	72.7323	76.1539	78.7954	56.5044	67.1741	66.4094	99.2678	99.7415	73.0302	69.9243	96.3422		6.14762	20.9123	55.4869	31.1665	36.3636	10.4713	30.1097	34.5851	5.80869	11.2803	37.6999	44.8534
54	72.7215	83.052	82.9487	78.0528	60.3753	64.7528	75.0224	90.0671	98.0894	85.6499	66.8769	95.9633		24.5721	24.202	64.0384	27.8585	37.747	18.7329	29.7556	33.9794	1.41008	15.3822	34.0252	57.8097
57	84.5933	87.0866	84.3473	80.7022	65.7692	71.7558	83.4564	90.8969	99.8314	92.8848	74.4953	100		28.4465	16.7788	85.5958	43.5427	45.1858	29.5366	30.5471	39.8633	5.31411	14.3153	57.7861	58.8071
60	89.704	84.8772	83.7296	83.6542	62.1521	60.0551	70.5928	88.2489	90.8631	76.8594	82.2884			34.0604	32.9338	85.921	49.274	49.1937	36.0383	41.4121	40.3478	15.1952	22.6642	61.5515	66.557
63	94.0588	78.4822	76.1888	92.1617	60.883	63.6364	70.0224	40.1952	94.6954	81.8299	87.1312			37.5299	60.5968	95.2203	45.2736	47.8656	40.0176	46.987	46.8374	29.5065	30.0704	73.018	77.7379
66	83.8267	80.87	62.6923	92.941	36.1889	60.3451	72.651	82.0134	95.6058	83.901	93.158			39.619	85.4225	72.915	53.0051	69.8024	58.4767	36.7745	47.7719	38.7667	34.7421	82.9194	95.372
69	90.6623	74.8868	71.7949	74.2024	32.0733	63.7089	64.8098	86.3941	95.0326	82.5571	99.5342			42.8677	100	75.7275	72.7666	77.1462	80.2405	42.8839	57.8697	37.9249	40.8639	84.666	91.3026
72	93.7713	77.3432	78.0653	84.5343	24.9297	62.085	68.8031	89.6888	97.9209	86.9569	93.1871			43.6223	90.1186	77.3045	71.353	81.5257	85.5886	62.6632	58.5273	48.8898	41.8169	87.9891	79.1442
75	91.1201	89.1862	75.5245	62.7888	41.9817	62.6939	59.698	89.579	87.6939	84.0943	94.4391				93.5184	88.9449	70.276	81.4783	80.3774	64.2252	71.8093	59.718	72.5917	53.3175
78	90.3748	97.8318	72.5408	62.1471	51.2374	67.3336	62.3154	98.3893	93.4255	82.5755	97.0594				96.429	91.1559	69.8625	82.1818	82.0199	65.3568	77.6413	63.4642	64.9265	66.6894
81	89.129	71.8403	68.7529	69.8111			67.7405	80.781	100	86.6624	100					92.424	63.8715	82.6008	100	68.2866	89.184	64.3692	66.677	59.8503
84	91.365																65.8333	80.0553	95.9718	68.3005	81.2754	60.3599	60.5759	68.2659
87																	69.3336	79.3439	99.7556	71.9661	92.9134	48.2479	68.6451	88.6923
90																	58.6883	69.7787	93.5178	68.6962	97.4561	59.3392	72.7263	100
93																	58.2844	73.2174	85.9112	67.7104	99.5501	62.675	70.4164	86.6848

## Sheet: Fig 6C
Timing of cytokinesis in minutes from SPB separation to the end of actomyosin ring contraction
wt	wt BP	clp1Δ	clp1Δ BP		Uncorrected Fisher's LSD	Mean Diff.	95.00% CI of diff.	Significant?	Summary	Individual P Value
39	63	54	54		clp1Δ vs. clp1Δ BP	-6.702	-9.432 to -3.971	Yes	****	<0.0001
42	60	45	63
42	60	39	51
36	57	45	54
39	69	45	48
42	54	48	57
39	54	51	54
36	48	51	51
39	60	54	63
42	51	42	57
42	39	45	51
36	51	48	57
39	57	42	57
39	42	48	42
39	48	48	48
36	48	45	60
39	51	45	48
42	57	45	48
42	66	45	57
36	48	51	54
42	48	42	57
39	42	48	48
39	57	45	51
42	48	42	54
36	48	48	45
39	48	42	51
45	51	48	63
39	45	57	48
36	42	42
36	54	39
39	63	54
39	42
42
39

## Sheet: Fig 6D
Percentage of cells with actomyosin rings over time, treated at time 0 with LatA (5µM) or with LatA (5µM) and BP (10µg/ml)
Time (min)	LatA					LatA +BP
15	32.1	3.8	8	13		36	30.8	35.3	18.2
30	20	15.4	4.3	13.6		27.6	35.7	37.5	39.1
45	13.8	12.5	4	18.2		37	34.5	43.8	46.4
60	7.4	12	4.2	19		39.3	33.3	41.2	46.4
75	8.7	13.6	8.7	20		42.3	31	43.8	46.2
90	13	12.5	4.8	10		50	42.3	52.9	44
105	13.6	8	0	9.5		52	63.6	60	47.8
