# Supplementary material for: A novel checkpoint pathway controls actomyosin ring constriction trigger in fission yeast
Source: eLife journal article supplement (doi:10.7554/elife.59333), 2020-10-26
Supplement: supp [file elife-59333-supp-v1.zip › elife_poa_e59333_Figure_7_figure_supplement_1.pdf]

Figure 7-figure supplement 1

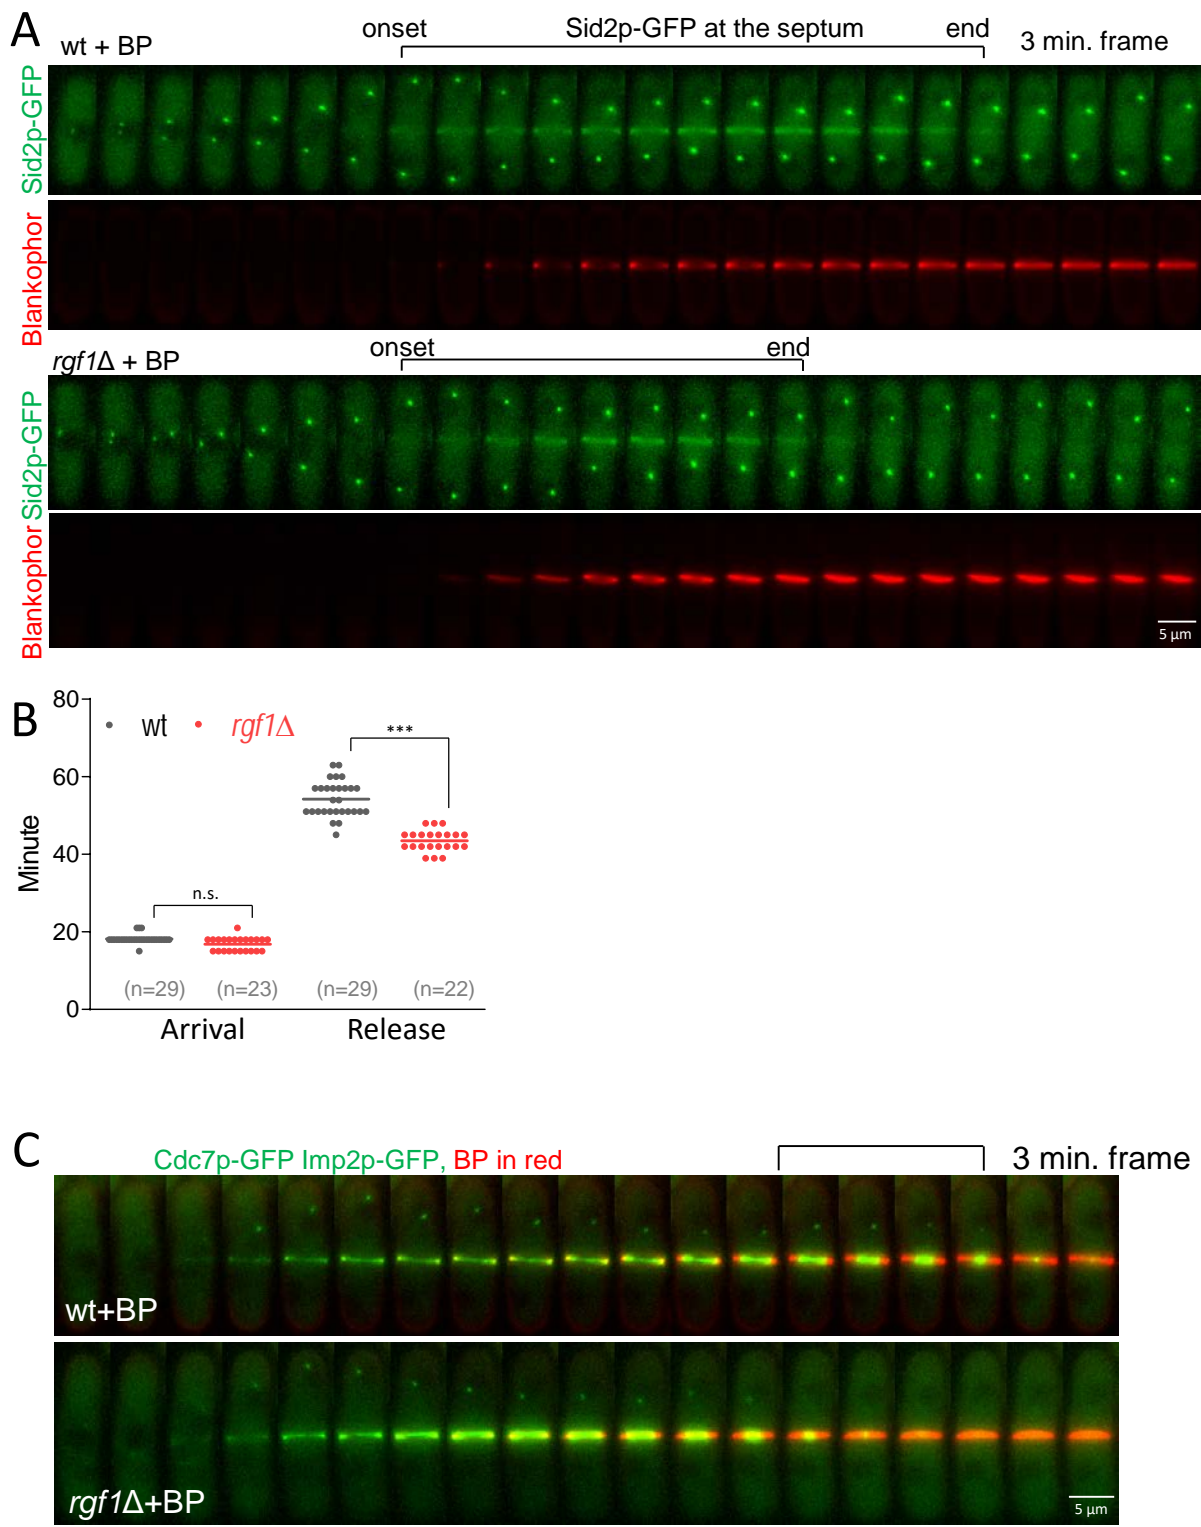

**Cell wall stress delays Sid2p silencing in wild-type cells but not in *rgf1Δ* cells** (Figure 7-figure supplement 1).

A) Time-lapse series of a representative Sid2p-GFP cell (n= 29) or Sid2p-GFP *rgf1Δ* cells (n = 23) treated with BP. (B) Quantitation of the arrival and release of Sid2p at the septum; time 0 is considered as the SPB separation of the cells in A. Statistical significance was calculated by ANOVA followed by Šídák's multiple comparisons test (n.s.  $p > 0.05$ ; \*\*\*  $p < 0.0001$ ). (C) Still images captured every 3 min taken from a movie of a representative Cdc7p-GFP Imp2p-GFP cell, or Cdc7p-GFP Imp2p-GFP *rgf1Δ* cell treated with BP (5μg/ml).
