# Supplementary material for: A novel checkpoint pathway controls actomyosin ring constriction trigger in fission yeast
Source: eLife journal article supplement (doi:10.7554/elife.59333), 2020-10-26
Supplement: supp [file elife-59333-supp-v1.zip › elife_poa_e59333_Figure_7_figure_supplement_1_source_data_1.xlsx]

## Sheet: Fig7 S1
Time in minutes of the arrival and release of Sid2-GFP at the septum; time 0 is SPBs separation
wt Arrival	rgf1Δ Arrival	wt Release	rgf1Δ Release		Sidak's multiple comparisons test	Mean Diff.	95.00% CI of diff.	Significant?	Summary	Adjusted P Value
18	15	57	45		wt Arrival vs. rgf1Δ Arrival	1.381	-0.4796 to 3.241	No	ns	0.1811
18	15	48	45		wt Release vs. rgf1Δ Release	10.71	8.823 to 12.59	Yes	****	<0.0001
18	18	57	42
18	15	54	42
21	18	57	45
18	15	57	39
18	18	51	42
18	18	51	45
18	18	54	39
21	15	60	42
18	15	63	45
18	18	63	48
18	18	57	42
18	18	48	39
18	15	51	48
18	15	60	48
18	18	51	42
18	18	57	42
21	15	57	45
18	21	51	42
18	18	45	45
18	18	51	45
18	15	51
18		57
18		51
18		51
18		60
18		51
15		51
