# Supplementary material for: A novel checkpoint pathway controls actomyosin ring constriction trigger in fission yeast
Source: eLife journal article supplement (doi:10.7554/elife.59333), 2020-10-26
Supplement: supp [file elife-59333-supp-v1.zip › elife_poa_e59333_Figure_7_source_data_1.xlsx]

## Sheet: Fig 7A
Percentage of cells with actomyosin rings over time, shifted to 36ºC at time 0h
Time (h)	-			BP 10µg/ml
2	19.5	17.7		15.6	20
3	2.7	6		3	5.2

## Sheet: Fig 7B
Cdc7p–EGFP intensity on the SPBs over time in cells with BP (5µg/ml) or w/o BP, with time 0 at SPB separation
Raw intensity on each SPB (A and B)
	YES																							YES +BP
Time (min)	A	B	A	B	A	B	A	B	A	B	A	B	A	B	A	B	A	B	A	B	A	B		A	B	A	B	A	B	A	B	A	B	A	B	A	B	A	B	A	B	A	B	A	B	A	B
-3	932	932	1006	1006	965	965	1052	1052	1013	1013	1014	1014	1079	1079	1029	1029	1112	1112	1020	1020	1040	1040		902	902	904	904	1004	1004	933	933	991	991	945	945	923	923	933	933	979	979	909	909	900	900	905	905
0	1012	1005	1001	1038	1027	975	1056	1044	1016	1040	1044	1033	963	954	896	961	1018	1090	1150	1011	1064	1066		917	898	915	930	1053	1001	944	949	1113	1069	1034	928	908	982	927	934	1018	1001	919	990	902	937	920	932
3	1146	1054	1044	1065	1011	1032	1082	1048	1027	1072	1070	1015	1029	1168	960	1002	1060	1096	1100	1114	1056	1107		945	960	986	952	1199	1026	966	977	994	1135	1011	988	925	1095	952	989	1097	1055	890	986	988	885	936	978
6	1266	1129	1157	1121	979	1056	1138	1141	1035	1072	1201	1075	1238	1080	1139	980	1120	1106	1216	1130	1143	1267		991	965	980	987	1196	1083	1083	1178	995	1020	1149	1078	960	1100	1043	992	1096	1139	1074	993	982	1013	1022	958
9	1521	1090	1139	1252	1182	1099	1197	1145	1299	1027	1177	1066	1147	1105	1282	1052	1248	1101	1165	1253	1345	1286		1002	1048	975	1160	1247	1060	1161	1309	1168	1066	1217	1070	1007	1217	1158	1069	1200	1086	1124	1004	990	1057	1068	980
12	1418	1045	1181	1207	1069	1035	1076	1088	1289	1001	1584	1030	1669	1072	1466	1027	1396	1096	1092	1101	1254	1076		1280	1128	1010	1068	1462	1111	1283	1076	1563	998	1638	1004	1165	1352	1145	1183	1404	1024	1327	996	973	959	1109	1080
15	1968	1045	1430	1060	1335	1053	1680	1020	1358	1007	1612	1060	1691	1078	1326	1005	1366	1076	1406	1090	1315	1076		1142	1019	952	1030	2405	1010	1933	1023	1597	926	1997	1015	1127	1214	1132	1057	1661	1014	1688	971	1104	933	1147	970
18	2083	1049	1665	1126	1393	1028	1716	1008	1367	999	1423	1039	1448	1062	1564	1041	1560	1054	1758	1029	1636	1069		1637	999	1048	956	2529	983	2075	986	1489	938	1706	1076	1311	1107	1264	1025	1459	965	1575	944	1301	891	1456	980
21	2112	1009	1252	990	1548	997	1348	955	1296	966	1398	981	1471	1071	1476	1035	1744	1106	1602	1015	1872	1088		1649	947	1113	916	2068	981	2330	1016	1402	940	1526	982	1798	1046	1580	1011	1697	1003	1460	967	1550	901	1686	931
24	1454	993	1235	1033	1355	998	1182	1013	1278	1010	1458	1046	1483	1078	1308	998	1770	1101	1525	1043	1620	1075		1575	956	1208	919	2391	942	2074	1007	1403	979	1612	987	1927	985	1863	993	1741	957	1693	973	1443	946	1450	922
27	1334	1003	973	1010	1239	1024	1090	1036	1115	1031	1319	1024	1200	1044	1120	1021	1738	1104	1507	1030	1346	1085		1704	969	1250	923	1863	952	2220	976	1519	957	1601	1015	1890	994	1710	1015	1611	987	1451	950	1312	938	1585	949
30	1125	1040	1010	1031	1303	986	1129	1026	1042	971	1203	1043	1107	1071	1105	1003	1468	1081	1189	1026	1518	1080		1626	963	1095	929	2076	960	1674	1077	1400	962	1793	968	1619	989	1623	992	1929	951	1585	982	1471	923	1390	947
33	1093	1018	992	1024	1100	989	1094	1045	1020	998	1178	1053	1028	1068	967	999	1658	1076	1331	992	1337	1117		1632	948	1134	939	2015	955	2292	1025	1336	992	1409	1000	1755	1068	1545	989	1693	954	1410	987	1405	944	1374	929
36	1036	1001	987	1039	1026	990	1071	1028	995	1004	1126	1011	1008	1031	999	997	1412	1109	1060	1058	1064	1071		1550	993	1349	927	1787	944	1917	1006	1420	957	1456	1043	1582	981	1566	991	1589	956	1443	967	1486	952	1245	961
39	1045	1025			1017	996	1087	1051	1019	1015	1015	1037	1052	1085	961	1021	1175	1137	1037	1043	1048	1116		1396	947	1283	942	1868	985	1754	1000	1276	951	1241	1038	1652	968	1571	973	1632	962	1206	975	1231	945	1226	972
42	1030	989			1003	997	1065	1070	1056	989	1030	1031	1011	1080	956	979	1065	1065	1039	1038	1097	1063		1528	960	1159	912	1602	941	2040	1031	1269	1024	1068	1018	1376	1016	1362	982	1517	956	944	1016	1026	920	1192	976
45	1070	1014			1040	1005	1046	1033	993	1003	972	1035	981	1064	977	966			1017	1044	1066	1140		1575	970	1048	979	1216	958	2436	1019	1276	983	1127	1017	1340	990	1141	1006	1248	973	980	999	993	928	959	948
48	1100	1022			1008	1021					1021	1013	1035	1020	976	994			1027	1015				1307	988	991	961	1052	957	1648	1007	1209	1004	1062	996	1402	1007	1015	990	1128	975	989	1024	1016	906	924	952
51	1047	978									1053	999	1057	1095	969	1017			996	1040				1274	953	1011	963	1085	945	1537	1004	1019	952	1037	1024	1138	996	960	990	1024	992	1025	976	938	929	912	953
54	1028	996									1017	1006	1031	1029	944	1010			1050	1104				1011	988	941	1027	1108	981	1177	1049	987	965	1020	964	1063	1075	957	963	1052	997	1018	982	957	942	886	944
57	1044	1000											1050	1015	957	981								978	975	984	985	1036	949	1084	997	942	950	1088	967	1044	968	967	978	1042	990	1041	986	933	907	914	953
60	1050	1018											996	967	940	983								967	979	980	992	1037	968	1051	1033	959	927	1054	977	1014	963	970	953	980	1006	1046	1013	925	918	895	956
63													1038	1046	955	985								961	998	969	984	1034	1007	1019	994	955	920	1040	989	1033	980	948	943	948	964	1036	1003	1011	933	908	962
66													1041	1022	957	1011								991	961	967	981	990	994	1006	991	989	950	1020	1073	1012	980	950	965	967	937	1044	1010	936	913
69													1037	1006	947	994								968	984	968	988	1021	950	969	997	962	956	1033	1029	1004	965	986	945	1030	952	1031	993	879	892
Normalized intensity (%) discriminating SPBs
	YES																								YES +BP
Time (min)	Brighter											Dimmer													Brighter													Dimmer
-3	0	4.76879	0	12.7464	11.7207	6.5625	16.9607	19.9102	12.5	3.65535		0	4.76879	0	12.7464	11.7207	6.5625	16.9607	19.9102	12.5	3.65535	0			0.496278	0	3.96725	0	10.4874	1.59027	1.47203	0.641026	4.23387	2.36613	3.12966	2.375		0.496278	0	3.96725	0	10.4874	1.59027	1.47203	0.641026	4.23387	2.36613	3.12966	2.375
0	6.77966	4.04624	10.6347	13.272	12.4688	11.25	1.22117	0	0	20.6266		6.18644	9.39306	1.71527	11.6951	18.4539	9.53125	0	9.73054	9.57447	2.48042	3.125			2.35732	2.47191	7.0529	0.73187	28.5081	9.91581	0	0	8.16532	3.61146	3.42772	4.25		0	5.8427	3.77834	1.06454	22.0089	0	7.26202	0.747863	6.45161	12.4533	8.64382	5.75
3	18.1356	10.2601	7.89022	16.6886	15.212	15.3125	10.1764	9.58084	5.58511	14.0992		10.339	13.2948	11.4923	12.2208	26.4339	6.71875	29.0366	15.8683	10.3723	15.9269	8.05288			5.83127	18.427	16.2468	2.19561	10.9306	7.76427	1.6683	2.67094	16.129	0	16.2444	6.25		7.69231	10.7865	5.35264	2.92748	31.7578	5.61272	18.3513	6.62393	11.8952	11.9552	0.894188	11.5
6	28.3051	26.5896	2.40137	24.0473	17.207	35.7812	38.5346	36.3772	13.5638	29.2428		16.6949	21.3873	15.6089	24.4415	26.4339	16.0938	17.0963	12.5748	11.7021	18.0157	27.2837			11.5385	17.0786	16.0579	9.98004	11.0783	20.6735	5.10304	12.3932	16.0282	22.9141	15.3502	17		8.31265	18.6517	8.94206	16.3007	14.7711	14.0318	18.842	6.94444	20.3629	12.8269	19.9702	9
9	49.9153	23.9884	37.2213	31.8003	83.0424	32.0312	26.1872	57.7844	30.5851	22.5849		13.3898	40.3179	22.9846	24.9672	15.212	14.6875	20.4885	23.3533	11.0372	34.0731	29.5673			12.9032	15.9551	19.2695	15.1697	36.6322	27.0346	9.71541	24.6795	26.5121	29.1407	16.5425	22.75		18.6104	57.5281	7.4937	25.0166	21.5657	13.2834	30.3239	15.1709	15.0202	14.1968	26.5276	11.75
12	41.1864	30.0578	17.8388	15.9001	80.5486	95.625	97.0149	85.3293	50.266	13.0548		9.57627	33.815	12.0069	17.477	8.72818	9.0625	16.0109	19.6108	10.3723	14.2298	4.32692			47.3945	23.8202	32.8086	23.2868	94.9778	66.4172	25.2208	23.2906	47.0766	54.4209	14.0089	27.875		28.536	36.8539	10.7053	9.51431	11.5214	7.10945	43.5721	27.3504	8.77016	13.2005	11.9225	24.25
15	87.7966	66.0405	63.4648	95.2694	97.7556	100	100	64.3713	46.2766	54.047		9.57627	12.5723	15.0943	8.54139	10.2244	13.75	16.825	16.3174	7.71277	12.7937	4.32692			30.273	10.7865	92.1914	66.5336	100	100	21.4917	21.9017	72.9839	99.3773	33.532	32.625		15.0124	28.3146	4.34509	5.98802	0.886263	8.13845	30.0294	13.8889	7.7621	10.0872	8.04769	10.5
18	97.5424	100	73.4134	100	100	70.4688	67.0285	100	72.0745	100		9.91526	22.1098	10.8062	6.96452	8.22943	10.4688	14.654	21.7066	4.78723	4.83029	3.48558			91.6873	32.3595	100	75.9814	84.0473	72.7783	39.5486	36.0043	52.621	85.3051	62.8912	71.25		12.531	11.6854	2.64484	3.52628	2.65879	13.8447	19.5289	10.4701	2.82258	6.72478	1.78838	11.75
21	100	40.3179	100	51.6426	82.2943	66.5625	70.1492	86.8264	96.5426	79.6345		6.52542	2.45665	5.48885	0	0	1.40625	15.8752	20.8084	11.7021	3.00261	5.76923			93.1762	46.9663	70.9698	92.9474	71.1965	55.9401	87.3405	69.7649	76.6129	70.9838	100	100		6.0794	2.69663	2.51889	5.52229	2.95421	5.05145	13.5427	8.97436	6.65323	9.58904	3.27869	5.625
24	44.2373	37.8613	66.8954	29.8292	77.8055	75.9375	71.7775	61.6767	100	69.5822		5.16949	8.67052	5.66038	7.62155	10.9726	11.5625	16.825	15.2695	11.0372	6.65796	4.20673			83.995	68.3146	91.3098	75.9148	71.3442	63.985	100	100	81.0484	100	84.0537	70.5		7.19603	3.37079	0.0629723	4.92349	8.71492	5.51918	7.55643	7.05128	2.01613	10.3362	9.9851	4.5
27	34.0678	0	46.9983	17.7398	37.1571	54.2188	33.3786	33.5329	95.7447	67.2324		6.01695	5.34682	10.1201	10.6439	16.2095	8.125	12.2117	18.7126	11.4362	4.96084	5.40865			100	77.7528	58.0605	85.6287	88.4786	62.956	96.369	83.6539	67.9436	69.863	64.5306	87.375		8.80893	4.26966	0.692695	2.86095	5.46529	8.13845	8.43965	9.40171	5.04032	7.47198	8.79285	7.875
30	16.3559	5.34682	57.976	22.8647	18.9526	36.0938	20.7598	31.2874	59.8404	25.718		9.15254	8.3815	3.60206	9.32983	1.24688	11.0938	15.8752	16.018	8.37766	4.43864	4.80769			90.3226	42.9213	71.4736	49.3014	70.901	80.9167	69.7743	74.359	100	86.5504	88.2265	63		8.06452	5.61798	1.19647	9.58084	6.20384	3.74181	7.94897	6.94444	1.41129	11.457	6.55738	7.625
33	13.6441	2.74566	23.1561	18.2654	13.4663	32.1875	10.0407	10.6287	85.1064	44.2559		7.28814	7.36994	4.11664	11.8265	7.98005	12.6562	15.4681	15.4192	7.71277	0	9.25481			91.067	51.6854	67.6322	90.4192	61.4476	44.9953	83.1207	66.0256	76.2097	64.7572	78.3905	61		6.20347	7.86517	0.881612	6.12109	10.6351	6.73527	15.7017	6.62393	1.71371	12.0797	9.68703	5.375
36	8.81356	2.02312	10.4631	15.2431	7.23192	24.0625	7.327	15.4192	52.3936	8.87729		5.84746	9.53757	4.28817	9.59264	9.47631	6.09375	10.4478	15.1198	12.1011	8.61619	3.72596			80.8933	100	53.2746	65.4691	73.8552	49.392	66.1433	68.2692	65.7258	68.8667	90.462	44.875		11.7866	5.16854	0.188917	4.85695	5.46529	10.7577	7.16389	6.83761	1.91532	9.58904	10.8793	9.375
39	9.57627		8.91938	17.3456	13.217	6.71875	13.2972	9.73054	20.8777	5.87467		7.88136		5.31732	12.615	12.2195	10.1562	17.7748	18.7126	15.8245	6.65796	9.13462			61.7866	85.1685	58.3753	54.6241	52.5849	29.2797	73.0128	68.8034	70.0605	39.3524	52.459	42.5		6.0794	8.53933	2.77078	4.45775	4.57902	10.29	5.88812	4.91453	2.52016	10.5853	9.83606	10.75
42	8.30509		6.51801	14.4547	22.4439	9.0625	7.73406	8.98204	6.25	6.13577		4.83051		5.48885	15.1117	5.73566	9.21875	17.0963	12.4252	6.25	6.00522	2.76442			78.1638	57.3034	41.6247	73.6527	51.551	13.0963	45.9274	46.4744	58.4677	6.72478	21.9076	38.25		7.69231	1.79775	0	6.52029	15.3619	8.41908	10.5986	5.87607	1.91532	15.6912	6.11028	11.25
45	11.6949		12.8645	11.958	6.73317	0	3.6635	12.1258		3.26371		6.94915		6.86106	10.2497	9.22693	9.84375	14.9254	10.479		6.78851	12.0192			83.995	32.3595	17.3174	100	52.5849	18.6155	42.3945	22.8633	31.3508	11.208	16.9896	9.125		8.933	16.8539	1.07053	5.72189	9.30576	8.32554	8.04711	8.44017	3.62903	13.5741	7.30253	7.75
48	14.2373		7.37564			7.65625	10.9905	11.9761		4.56919		7.62712		9.60549			6.40625	8.95522	14.6707		3.00261				50.7444	19.5506	6.98992	47.5715	42.6883	12.5351	48.4789	9.40171	19.254	12.3288	20.4173	4.75		11.1662	12.809	1.00756	4.92349	12.4077	6.36109	9.71541	6.73077	3.83065	16.6874	4.02384	8.25
51	9.74576					12.6562	13.9756	10.9281		0.522193		3.89831					4.21875	19.1316	18.1138		6.26632				46.6501	24.0449	9.06801	40.1863	14.6233	10.1965	22.5711	3.52564	8.77016	16.8119	8.79285	3.25		6.82382	13.2584	0.251889	4.72389	4.72674	8.98035	8.63592	6.73077	5.54436	10.7098	7.45157	8.375
54	8.13559					7.03125	10.4478	7.18563		7.5718		5.42373					5.3125	10.1764	17.0659		14.6214				14.0198	8.31461	10.5164	16.2342	9.8966	8.60617	15.211	3.20513	11.5927	15.9402	11.6244	0		11.1662	27.6405	2.51889	7.7179	6.64697	3.36763	16.3886	3.84615	6.04839	11.457	9.38897	7.25
57	9.49153						13.0258	9.13174				5.76271						8.2768	12.7246						9.92556	17.9775	5.98237	10.0466	3.24963	14.9673	13.3464	4.2735	10.5847	18.8045	8.04769	3.5		9.55335	18.2022	0.503778	4.25815	4.43131	3.64827	5.88812	5.44872	5.34274	11.9552	4.17288	8.375
60	10						5.69878	6.58683				7.28814						1.76391	13.0239						8.56079	17.0786	6.04534	7.85097	5.76071	11.7867	10.4024	4.59402	4.33468	19.4272	6.85544	1.125		10.0496	19.7753	1.70025	6.65336	1.03397	4.58372	5.39745	2.77778	6.95564	15.3176	5.81222	8.75
63							11.3976	8.83234										12.483	13.3233						7.81638	14.6067	5.85642	5.72189	5.16987	10.4771	12.2669	2.24359	1.10887	18.1818	19.6721	2.75		12.407	17.9775	4.15617	4.05855	0	5.70627	7.06575	1.7094	2.72177	14.0722	8.04769	9.5
66							11.8046	9.13174										9.22659	17.2156						11.5385	14.1573	3.08564	4.85695	10.192	8.60617	10.2061	2.45727	3.02419	19.1781	8.49478			7.81638	17.3034	3.33753	3.85895	4.43131	13.5641	7.06575	4.05983	0	14.944	5.06706
69							11.2619	7.63473										7.05563	14.6707						8.68486	14.382	5.03778	2.39521	6.20384	9.82226	9.421	6.30342	9.375	17.5591	0			10.67	18.8764	0.566751	4.25815	5.31758	9.44808	5.59372	1.92308	1.5121	12.8269	1.93741

## Sheet: Fig 7C
Timing of cytokinesis in minutes from SPB separation to the end of actomyosin ring contraction @32ºC
wt	wt +BP	sid1-239	sid1-239 +BP	sid2-250	sid2-250 +BP		Sidak's multiple comparisons test	Mean Diff.	95.00% CI of diff.	Significant?	Summary	Adjusted P Value
27	39	33	36	39	39		wt vs. wt +BP	-11.32	-13.28 to -9.355	Yes	****	<0.0001
33	45	36	39	39	36		sid2-250 vs. sid2-250 +BP	-2.18	-5.162 to 0.8030	No	ns	0.2216
30	33	30	36	39	39		sid1-239 vs. sid1-239 +BP	-6.769	-9.462 to -4.076	Yes	****	<0.0001
33	45	33	36	30	45
33	39	30	39	39	39
36	33	30	42	36	36
33	42	33	36	33	39
30	39	30	39	36	39
33	36	30	39	36	42
30	45	30	39	36	39
33	51	33	42	42	36
33	42	33	39	36	42
33	48	30	39	36	42
30	45	30	42	36	33
30	45	30	36	39	36
33	39	33	39	33	36
33	51	33	42	33	39
33	42	33	33	33	45
30	39	30	36	36	36
33	39	30	36	36	39
30	36	30	42	36	36
33	36	30	39		36
33	36	33	36		42
33	45	30	39		36
30	39	30	39		33
30	36	33	36		36
30	39	33	39		39
36	33	33	39		39
30	57	33			39
36	51	33			39
33	42	33			36
33	45	30
33	42	30
36	51	33
36	42
36	42
36	45
36	48
33	45
33	48
36	78
36	45
33	48
33	42
39	45
36	57
36	51
39	51
39	54
36	42
33	51
33	45
36	51
36	60
33	48
	42
	42
	45
	51
	45
	42
